# Supplementary material
Source: PubMed Central journal article supplement (PMC6583237)
Supplement: jama-319-5-s002.pdf [file jama-319-5-s002.pdf]

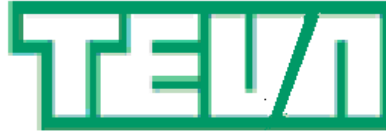

1  
2  
3  
4  
5  
6  
7  
8  
9  
10  
11  
12  
13  
14  
15  
16  
17  
18  
19  
20  
21  
22  
23  
24  
25  
26  
27  
28  
29  
30  
31

**Statistical Analysis Plan**  
**TV48125-CNS-30050**

**A Multicenter, Randomized, Double-Blind, Placebo-Controlled, Parallel-Group Study  
Comparing the Efficacy and Safety of 2 Dose Regimens of Subcutaneous Administration of  
TEV-48125 Versus Placebo for the Preventive Treatment of Episodic Migraine  
Phase 3**

**IND number: 106,533 EudraCT number: 2015-004549-23**

**Statistical Analysis Plan Approval Date: 31-May-16**

**Statistical Analysis Plan with Amendment 01 Approval Date: 27-March-17**

**Statistical Analysis Plan with Amendment 02 Approval Date: 26-May-17**

**Sponsor**

**Teva Branded Pharmaceutical  
Products R&D, Inc.  
41 Moores Road  
Frazer, Pennsylvania 19355  
United States**

**Prepared by: Yuju Ma**  
**Global Biometrics and Quantitative Sciences**

32  
33  
34

### STATISTICAL ANALYSIS PLAN APPROVAL

**Study No.:** TV48125-CNS-30050

**Study Title:** A Multicenter, Randomized, Double-Blind, Placebo-Controlled, Parallel Group Study Comparing the Efficacy and Safety of 2 Dose Regimens of Subcutaneous Administration of TEV-48125 Versus Placebo for the Preventive Treatment of Episodic Migraine

**Statistical Analysis Plan for:**

- Interim Analysis
- Final Analysis
- Integrated Summary of Efficacy
- Integrated Summary of Safety

**Amendment 02**

**Author:** Yuju Ma  
Associate Director, Global Biometrics an Quantitative Sciences



5/26/2017

Approver: Ronghua Yang, PhD  
Senior Director, Global Biometrics an Quantitative Sciences

Date

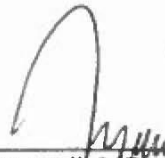  


Ernesto Aycardi, MD  
Vice President, TA Head  
Headache & Migraine

5/26/2017

Approver: Ernesto Aycardi, MD  
Global Clinical Development  
Vice President, TA Head, Headache & Migraine

Date

35

|    |                                                                 |  |    |
|----|-----------------------------------------------------------------|--|----|
| 36 | <b>TABLE OF CONTENTS</b>                                        |  |    |
| 37 | TITLE PAGE .....                                                |  | 1  |
| 38 | STATISTICAL ANALYSIS PLAN APPROVAL .....                        |  | 2  |
| 39 | AMENDMENT HISTORY .....                                         |  | 8  |
| 40 | LIST OF ABBREVIATIONS AND DEFINITIONS OF TERMS .....            |  | 9  |
| 41 | PREFACE .....                                                   |  | 12 |
| 42 | 1. STUDY OBJECTIVES .....                                       |  | 13 |
| 43 | 1.1. Primary Objectives .....                                   |  | 13 |
| 44 | 1.2. Secondary Objectives .....                                 |  | 13 |
| 45 | 1.3. Exploratory Objectives .....                               |  | 13 |
| 46 | 2. STUDY DESIGN .....                                           |  | 16 |
| 47 | 2.1. General Design and Study Schema.....                       |  | 16 |
| 48 | 2.2. Primary and Secondary Measures and Endpoints .....         |  | 22 |
| 49 | 2.2.1. Primary Efficacy Endpoint .....                          |  | 22 |
| 50 | 2.2.2. Secondary Efficacy Endpoints.....                        |  | 22 |
| 51 | 2.2.3. Exploratory Efficacy Endpoints .....                     |  | 22 |
| 52 | 2.2.4. Safety and Tolerability Endpoints .....                  |  | 24 |
| 53 | 2.2.5. Pharmacokinetic/Immunogenicity/Biomarker Endpoints ..... |  | 24 |
| 54 | 2.2.5.1. Pharmacokinetic Endpoints .....                        |  | 24 |
| 55 | 2.2.5.2. Immunogenicity Endpoint .....                          |  | 24 |
| 56 | 2.2.5.3. Biomarker Endpoints .....                              |  | 25 |
| 57 | 2.3. Sample Size and Power Considerations .....                 |  | 25 |
| 58 | 2.4. Randomization and Blinding .....                           |  | 25 |
| 59 | 2.4.1. Randomization.....                                       |  | 25 |
| 60 | 2.4.2. Blinding/Unblinding .....                                |  | 25 |
| 61 | 2.5. Sequence of Planned Analyses .....                         |  | 26 |
| 62 | 2.5.1. Interim Analyses .....                                   |  | 26 |
| 63 | 2.5.2. Final Analyses and Reporting.....                        |  | 26 |
| 64 | 3. POPULATIONS / ANALYSIS SETS.....                             |  | 27 |
| 65 | 3.1. Intent-to-Treat Population .....                           |  | 27 |
| 66 | 3.2. Safety Population.....                                     |  | 27 |
| 67 | 3.3. Full Analysis Set.....                                     |  | 27 |

68 3.4. Per-Protocol Analysis Set .....27

69 4. GENERAL ISSUES FOR DATA ANALYSIS .....28

70 4.1. General.....28

71 4.2. Specification of Baseline Values .....28

72 4.3. Region of Pooled Countries.....29

73 4.4. Multiple Comparisons and Multiplicity.....29

74 4.5. Handling Withdrawals and Missing Data.....30

75 4.6. Study Days and Visit Windows .....31

76 5. STUDY POPULATION SUMMARY .....32

77 5.1. General.....32

78 5.2. Patient Disposition.....32

79 5.3. Demographics and Baseline Characteristics.....32

80 5.4. Medical History .....32

81 5.5. Prior Medications or Therapy .....33

82 5.6. Electrocardiography.....33

83 5.7. Physical Examinations.....33

84 5.8. Protocol Violations .....33

85 5.9. Childbearing Potential .....33

86 6. EFFICACY ANALYSIS .....34

87 6.1. General.....34

88 6.2. Primary Efficacy Variable(s) and Analysis .....35

89 6.2.1. Variable Definition .....35

90 6.2.2. Primary Analysis .....36

91 6.2.3. Sensitivity Analysis .....36

92 6.2.3.1. MMRM Analysis.....36

93 6.2.3.2. Analysis with Multiple Imputation Method .....37

94 6.3. Secondary Efficacy Variables and Analysis.....38

95 6.3.1. Variable Definition .....38

96 6.3.1.1. Electronic Headache Diary Data .....38

97 6.3.1.2. Migraine Disability Assessment (MIDAS) .....38

98 6.3.2. Analysis of Secondary Efficacy Variables .....39

99 6.4. Exploratory Efficacy Variables and Analysis.....40

100 6.4.1. Variable Definition .....40

|     |          |                                                                          |    |
|-----|----------|--------------------------------------------------------------------------|----|
| 101 | 6.4.1.1. | Electronic Headache Diary Data .....                                     | 40 |
| 102 | 6.4.1.2. | Migraine-Specific Quality of Life .....                                  | 41 |
| 103 | 6.4.1.3. | EuroQol-5 Dimension Questionnaire .....                                  | 41 |
| 104 | 6.4.1.4. | Patient Health Questionnaire .....                                       | 41 |
| 105 | 6.4.1.5. | Work Productivity and Activity Impairment Questionnaire: General Health  |    |
| 106 |          | V2.0 .....                                                               | 42 |
| 107 | 6.4.1.6. | Patient’s Global Impression of Change .....                              | 42 |
| 108 | 6.4.2.   | Exploratory Efficacy Analysis.....                                       | 42 |
| 109 | 6.4.2.1. | Electronic Headache Diary Data .....                                     | 42 |
| 110 | 6.4.2.2. | Migraine-Specific Quality of Life .....                                  | 43 |
| 111 | 6.4.2.3. | EuroQol-5 Dimension Questionnaire .....                                  | 43 |
| 112 | 6.4.2.4. | Patient Health Questionnaire .....                                       | 43 |
| 113 | 6.4.2.5. | Work Productivity and Activity Impairment Questionnaire : General Health |    |
| 114 |          | V2.0 .....                                                               | 43 |
| 115 | 6.4.2.6. | Patient’s Global Impression of Change Scale .....                        | 44 |
| 116 | 6.5.     | Subgroup Analysis.....                                                   | 44 |
| 117 | 7.       | SAFETY ANALYSIS .....                                                    | 45 |
| 118 | 7.1.     | General.....                                                             | 45 |
| 119 | 7.2.     | Study Drug Administration.....                                           | 45 |
| 120 | 7.3.     | Adverse Events .....                                                     | 45 |
| 121 | 7.4.     | Injection Site Assessments .....                                         | 46 |
| 122 | 7.5.     | Deaths .....                                                             | 47 |
| 123 | 7.6.     | Clinical Laboratory Tests .....                                          | 48 |
| 124 | 7.7.     | Vital Signs .....                                                        | 50 |
| 125 | 7.8.     | Electrocardiography.....                                                 | 50 |
| 126 | 7.9.     | Physical Examinations.....                                               | 51 |
| 127 | 7.10.    | Electronic Columbia-Suicide Severity Rating Scale .....                  | 51 |
| 128 | 7.11.    | Concomitant Therapy or Medication.....                                   | 51 |
| 129 | 8.       | PHARMACOKINETIC ANALYSIS .....                                           | 52 |
| 130 | 9.       | BIOMARKER ANALYSIS.....                                                  | 52 |
| 131 | 10.      | STATISTICAL SOFTWARE .....                                               | 53 |
| 132 | 11.      | CHANGES TO PROTOCOL SPECIFIED ANALYSES .....                             | 54 |
| 133 | 12.      | REFERENCES .....                                                         | 55 |

134 APPENDIX A. E-DIARY QUESTIONNAIRE.....56

135 APPENDIX B. LOGICS FOR ENDPOINTS DERIVATION .....58

136 APPENDIX C. THE MIGRAINE DISABILITY ASSESSMENT .....59

137 APPENDIX D. MIGRAINE-SPECIFIC QUALITY OF LIFE QUESTIONNAIRE (MSQ)

138 (VERSION 2.1) .....60

139 APPENDIX E. SCORING INSTRUCTIONS FOR MSQ (VERSION 2.1).....65

140 APPENDIX F. EQ-5D-5L AND EQ VAS.....67

141 APPENDIX G. PATIENT HEALTH QUESTIONNAIRE (PHQ-2) AND (PHQ-9).....69

142 APPENDIX H. WORK PRODUCTIVITY AND ACTIVITY IMPAIRMENT

143 QUESTIONNAIRE: GENERAL HEALTH V2.0 (WPAI:GH).....71

144 APPENDIX I. PATIENT’S GLOBAL IMPRESSION OF CHANGE (PGIC) SCALE .....73

145

146  
147  
148  
149  
150  
151  
152  
153  
154  
155  
156

**LIST OF TABLES**

Table 1: Study Procedures and Assessments .....19  
Table 2: Pooled Countries by Region .....29  
Table 3: Severity of Pain Scale for Injection Site Assessments .....47  
Table 4: Clinical Laboratory Test .....48  
Table 5: Criteria for Potentially Clinically Significant Laboratory Values .....49  
Table 6: Criteria for Potentially Clinically Significant Vital Signs .....50

**LIST OF FIGURES**

Figure 1: Overall Study Schema .....18

157 **AMENDMENT HISTORY**

158 The Statistical Analysis Plan for study TV48125-CNS-30050 (study protocol with amendment 01  
159 dated 30 March 2016) has been amended and reissued as follows:

| <b>Amendment number</b> | <b>Date</b>   | <b>Summary of changes</b>                                                                                                                                                                                                                                                                                                                                                                                | <b>Reason for amendment</b>                                                     |
|-------------------------|---------------|----------------------------------------------------------------------------------------------------------------------------------------------------------------------------------------------------------------------------------------------------------------------------------------------------------------------------------------------------------------------------------------------------------|---------------------------------------------------------------------------------|
| 01                      | 27 March 2017 | Section 2.2.3, two exploratory efficacy endpoints to analyze the change from baseline of the weekly number of migraine days /headache days of at least moderate severity are added.                                                                                                                                                                                                                      | Teva Clinical decision                                                          |
|                         |               | Section 3.3, the definition of FAS is changed from “all patients in the ITT population who receive at least 1 dose of study drug and have at least <b>1</b> post baseline efficacy assessment on the primary endpoint” to “all patients in the ITT population who receive at least 1 dose of study drug and have at least <b>10</b> days of post baseline efficacy assessments on the primary endpoint”. | Per review comments from the FDA                                                |
|                         |               | Section 4.2, the baseline for calculating weekly endpoints is added.                                                                                                                                                                                                                                                                                                                                     | Teva Clinical decision                                                          |
|                         |               | Section 4.3, Germany is removed from Table 2, Israel and Finland are added.                                                                                                                                                                                                                                                                                                                              | Germany did not participate in the study. Israel and Finland enrolled patients. |
|                         |               | Section 4.4, the hierarchical testing sequence is modified.                                                                                                                                                                                                                                                                                                                                              | Teva Clinical decision                                                          |
|                         |               | Section 4.5, the missing data handling rule is modified. The BOCF imputation is removed. The monthly efficacy variables will be prorated to 28 days if the patient has $\geq 10$ days of e-diary data for the month. If a patient has $< 10$ days of e-diary data for a month, the monthly number of days/hours of efficacy variables will be considered as missing.                                     | Per review comments from the FDA                                                |
|                         |               | Section 4.5, The missing data handling rule for calculating weekly efficacy variables is added.<br><br>Section 4.6, the weekly window for the first month (28-days) post the first dose is defined.                                                                                                                                                                                                      | Teva Clinical decision                                                          |



| <b>Amendment number</b> | <b>Date</b>   | <b>Summary of changes</b>                                                                                                                                                                                                                                                                                                                                                                                | <b>Reason for amendment</b>                   |
|-------------------------|---------------|----------------------------------------------------------------------------------------------------------------------------------------------------------------------------------------------------------------------------------------------------------------------------------------------------------------------------------------------------------------------------------------------------------|-----------------------------------------------|
| 01                      | 27 March 2017 | <p>Section 5.3, the population for the baseline efficacy summary is changed from FAS/PP to ITT population.</p> <p>Section 6.1, derivation of the change from baseline of the weekly number of days of the efficacy variables is added.</p>                                                                                                                                                               | Teva Clinical direction                       |
|                         |               | <p>Section 6.2.2, the normality of the residuals from the ANCOVA model will be checked using Shapiro Wilk's normality test. If the test has a p value <math>\leq 0.001</math>, Wilcoxon rank-sum test will be conducted as the primary analysis.</p> <p>Section 6.2.3.1, the BOCF sensitivity analysis is removed. The missing value handling for MMRM analysis is updated per rules in section 4.5.</p> | Incorporation of review comments from the FDA |
|                         |               | Section 6.4.1.1, the analysis for weekly efficacy endpoints is added.                                                                                                                                                                                                                                                                                                                                    | Teva Clinical decision                        |
|                         |               | Section 6.5, age groups of '46-65' and '>65' are consolidated as 1 group, ">45 years old"                                                                                                                                                                                                                                                                                                                | Teva Clinical decision                        |
| 02                      | 18 May 2017   | Section 6.2.2: changed test level for Shapiro-Wilk's test from 0.001 to 0.01                                                                                                                                                                                                                                                                                                                             | FDA feedback 5/18/2017                        |

160 **LIST OF ABBREVIATIONS AND DEFINITIONS OF TERMS**

| <b>Abbreviation</b> | <b>Term</b>                                                                                 |
|---------------------|---------------------------------------------------------------------------------------------|
| β-HCG               | beta-human chorionic gonadotropin                                                           |
| ADA                 | antidrug antibody                                                                           |
| AE                  | adverse event                                                                               |
| ALP                 | alkaline phosphatase                                                                        |
| ALT                 | alanine aminotransferase                                                                    |
| ANC                 | absolute neutrophil counts                                                                  |
| ANCOVA              | analysis of covariance                                                                      |
| AST                 | aspartate aminotransferase                                                                  |
| BUN                 | Blood urea nitrogen                                                                         |
| CM                  | chronic migraine                                                                            |
| CRF                 | case report form (refers to any media used to collect study data [ie, paper or electronic]) |
| CSR                 | Clinical study report                                                                       |
| ECG                 | electrocardiography/electrocardiogram                                                       |
| eC-SSRS             | Electronic Columbia-Suicide Severity Rating Scale                                           |
| EM                  | episodic migraine                                                                           |
| EOT                 | end of treatment (visit)                                                                    |
| EQ-5D-5L            | EuroQol-5 Dimension, 5 response level version                                               |
| EU                  | European Union                                                                              |
| FAS                 | full analysis set                                                                           |
| FDA                 | Food and Drug Administration (United States)                                                |
| FSH                 | follicle-stimulating hormone                                                                |
| GBP                 | global branded product                                                                      |
| GGT                 | gamma-glutamyl transpeptidase                                                               |
| HCG                 | Human chorionic gonadotropin                                                                |
| ICH                 | International Conference on Harmonisation                                                   |
| ICHD-3              | International Classification of Headache Disorders, 3 <sup>rd</sup> revision                |
| IHS                 | International Headache Society                                                              |
| INR                 | international normalized ratio                                                              |
| IRT                 | interactive response technology                                                             |

| <b>Abbreviation</b> | <b>Term</b>                                                 |
|---------------------|-------------------------------------------------------------|
| ITT                 | intent-to-treat                                             |
| LDH                 | lactate dehydrogenase                                       |
| LS                  | least square                                                |
| MedDRA              | Medical Dictionary for Regulatory Activities                |
| MMRM                | Mixed-effects Model Repeated Measures                       |
| MIDAS               | Migraine Disability Assessment                              |
| MSQOL               | Migraine-Specific Quality of Life                           |
| NSAID               | non-steroidal anti-inflammatory drug                        |
| PBO                 | placebo                                                     |
| PGIC                | Patient Global Impression of Change                         |
| PHQ-2               | 2-item Patient Health Questionnaire                         |
| PHQ-9               | 9-item Patient Health Questionnaire                         |
| PT                  | Preferred term                                              |
| RBC                 | red blood cell                                              |
| R&D                 | Research and Development                                    |
| SAP                 | Statistical Analysis Plan                                   |
| sc                  | subcutaneous(ly)                                            |
| SD                  | standard deviation                                          |
| SOC                 | system organ class                                          |
| SUSAR               | suspected unexpected serious adverse reaction               |
| ULN                 | upper limit of the normal range                             |
| WBC                 | white blood cell                                            |
| WHO Drug            | World Health Organization dictionary of medical codes       |
| WPAI (:GH)          | Work Productivity and Activity Impairment (:General Health) |

**162 PREFACE**

163 This Statistical Analysis Plan (SAP) describes the planned analysis and reporting for Teva Branded  
164 Pharmaceuticals Products R&D, Inc. study TV48125-CNS-30050, (A Multicenter, Randomized,  
165 Double-Blind, Placebo-Controlled, Parallel Group Study Comparing the Efficacy and Safety of 2  
166 Dose Regimens of Subcutaneous Administration of TEV-48125 Versus Placebo for the Preventive  
167 Treatment of Episodic Migraine) and was written in accordance with standard operating procedure  
168 GBP\_RD\_702 (Teva Pharmaceuticals Global Branded Product (GBP) Research and Development  
169 (R&D) Statistical Analysis Plan).

170 This Phase 3 study is being conducted to evaluate the efficacy, safety, and immunogenicity of 2  
171 dose regimens of subcutaneous (sc) administration of TEV-48125 versus placebo for the preventive  
172 treatment of episodic migraine (EM).

173 The structure and content of this SAP provides sufficient detail to meet the requirements identified  
174 by the Food and Drug Administration (FDA) and International Conference on Harmonization (ICH)  
175 of Technical Requirements for Trials. All work planned and reported for this SAP will follow  
176 internationally accepted Registration of Pharmaceuticals for Human Use (ICH): E9 Guidance on  
177 Statistical Principles in Clinical guidelines, published by the American Statistical Association, and  
178 the Royal Statistical Society, for statistical practice.

179 The following documents were reviewed in preparation of this SAP:

- 180 • Clinical Study Protocol TV48125-CNS-30050 with Amendment 01
- 181 • Case report forms (CRFs) for Study TV48125-CNS-30050.
- 182 • ICH E9 Guidance on Statistical Principles for Clinical Trials.
- 183 • ICH E3 Structure and Content of Clinical Study Reports

184 The reader of this SAP is encouraged to also read the clinical protocol for details on the conduct of  
185 this study, and the operational aspects of clinical assessments and timing for completing a patient in  
186 this study. When differences exist in descriptions or explanations provided in the protocol and this  
187 SAP, the SAP prevails; the discrepancies will be explained in the Clinical Study Report (CSR).

188 **1. STUDY OBJECTIVES**

189 **1.1. Primary Objectives**

190 The primary objectives of this study are as follows:

- 191 • to demonstrate the efficacy of 2 dose regimens of TEV-48125, as assessed by the  
192 decrease in the monthly average number of migraine days during the 12-week period  
193 after the 1<sup>st</sup> dose of study drug relative to the baseline period
- 194 • to evaluate the safety and tolerability of 2 dose regimens of TEV-48125 in the  
195 preventive treatment of EM

196 **1.2. Secondary Objectives**

197 The secondary objectives of the study are as follows:

- 198 • to evaluate the proportion of patients reaching at least 50% reduction in the monthly  
199 average number of migraine days with TEV-48125 during the 12-week period after the  
200 1<sup>st</sup> dose of study drug relative to the baseline period
- 201 • to demonstrate the efficacy of TEV-48125, as assessed by the reduction in the monthly  
202 average number of days of use of any acute headache medications during the 12-week  
203 period after the 1<sup>st</sup> dose of study drug relative to the baseline period
- 204 • to demonstrate the efficacy of TEV-48125, as assessed by the reduction of the number  
205 of migraine days during the 4-week period after the 1<sup>st</sup> dose of study drug relative to the  
206 baseline period
- 207 • to demonstrate the efficacy of TEV-48125, as assessed by the reduction in the monthly  
208 average number of migraine days during the 12-week period after the 1<sup>st</sup> dose of study  
209 drug relative to the baseline period in patients not receiving concomitant migraine  
210 preventive medications at baseline
- 211 • to demonstrate the efficacy of TEV-48125, as assessed by the reduction of  
212 migraine-related disability as measured by the Migraine Disability Assessment  
213 (MIDAS) questionnaire, at 4 weeks after the last (3<sup>rd</sup>) dose of study drug relative to  
214 baseline
- 215 • to evaluate the immunogenicity of TEV-48125 and the impact of antidrug antibodies  
216 (ADA)s on efficacy and safety during 12 weeks of treatment with TEV-48125

217 **1.3. Exploratory Objectives**

218 The exploratory objectives of the study are as follows:

- 219 • to demonstrate the efficacy of TEV-48125, as assessed by the decrease in the monthly  
220 average number of headache days of at least moderate severity during the 12-week  
221 period after the 1<sup>st</sup> dose of study drug relative to the baseline period

- 222 • to evaluate the proportion of patients reaching at least 75% reduction and total (100%)  
223 reduction in the monthly average number of migraine days during the 12-week period  
224 after the 1<sup>st</sup> dose of study drug
- 225 • to evaluate the proportion of patients reaching at least 50% reduction and at least 75%  
226 reduction in the number of migraine days during the 4-week period after the 1<sup>st</sup> dose of  
227 study drug relative to the baseline period who sustain this level of response over the  
228 12-week period after the 1<sup>st</sup> dose of study drug
- 229 • to demonstrate the efficacy of TEV-48125 in patients who previously used topiramate  
230 for migraine, but discontinued, as assessed by the reduction of the monthly average  
231 number of migraine days during the 12-week period after the 1<sup>st</sup> dose of study drug  
232 relative to the baseline period
- 233 • to demonstrate the efficacy of TEV-48125 in patients who previously used  
234 onabotulinumtoxinA for migraine, but discontinued, as assessed by the reduction of the  
235 monthly average number of migraine days during the 12-week period after the 1<sup>st</sup> dose  
236 of study drug relative to the baseline period
- 237 • to demonstrate the efficacy of TEV-48125, as assessed by the reduction of the number  
238 of migraine days during the 4-week period after the 2<sup>nd</sup> dose of study drug and the  
239 4-week period after the last (3<sup>rd</sup>) dose of study drug relative to the baseline period
- 240 • to demonstrate the efficacy of TEV-48125, as assessed by the reduction of the monthly  
241 average number of headache days of any severity during the 12-week period after the 1<sup>st</sup>  
242 dose of study drug relative to the baseline period
- 243 • to demonstrate the efficacy of TEV-48125, as assessed by the reduction in the number of  
244 headache days of at least moderate severity during the 4-week period after each dose of  
245 study drug relative to the baseline period
- 246 • to evaluate the proportion of patients reaching at least 50% reduction, at least 75%  
247 reduction, and total (100%) reduction in the monthly average number of headache days  
248 of at least moderate severity during the 12-week period after the 1<sup>st</sup> dose of study drug
- 249 • to evaluate the proportion of patients reaching at least 50% reduction and at least 75%  
250 reduction in the number of headache days of at least moderate severity during the  
251 4-week period after the 1<sup>st</sup> dose of study drug for whom this level of effect is sustained  
252 throughout the 12-week period after the 1<sup>st</sup> dose of study drug
- 253 • to demonstrate the efficacy of TEV-48125, as assessed by the reduction in the number of  
254 headache days of at least moderate severity during the 12-week period after the 1<sup>st</sup> dose  
255 of study drug for patients not receiving concomitant preventive migraine medications  
256 relative to the baseline period
- 257 • to demonstrate the efficacy of TEV-48125, as assessed by the reduction in the number of  
258 headache days of at least moderate severity during the 12-week period after the 1<sup>st</sup> dose  
259 of study drug for patients who used topiramate for migraine in the past relative to the  
260 baseline period

- 261 • to demonstrate the efficacy of TEV-48125, as assessed by the reduction in the number of  
262 headache days of at least moderate severity during the 12-week period after the 1<sup>st</sup> dose  
263 of study drug for patients who used onabotulinumtoxinA for migraine in the past relative  
264 to the baseline period
- 265 • to demonstrate the efficacy of TEV-48125, as assessed by the reduction in the monthly  
266 average number of headache hours of any severity during the 12-week period after the  
267 1<sup>st</sup> dose of study drug relative to the baseline period
- 268 • to demonstrate the efficacy of TEV-48125, as assessed by the reduction in the monthly  
269 average number of headache hours of at least moderate severity during the 12-week  
270 period after the 1<sup>st</sup> dose of study drug relative to the baseline period
- 271 • to demonstrate the efficacy of TEV-48125, as assessed by the reduction of the monthly  
272 average number of days of the use of migraine-specific acute headache medications  
273 (triptans and ergot compounds) during the 12-week period after the 1<sup>st</sup> dose of study  
274 drug relative to the baseline period
- 275 • to demonstrate the efficacy of TEV-48125, as assessed by the reduction of the monthly  
276 average number of days with nausea or vomiting during the 12-week period after the 1<sup>st</sup>  
277 dose of study drug relative to the baseline period
- 278 • to demonstrate the efficacy of TEV-48125, as assessed by the reduction of the monthly  
279 average number of days with photophobia and phonophobia during the 12-week period  
280 after the 1<sup>st</sup> dose of study drug relative to the baseline period
- 281 • to demonstrate the efficacy of TEV-48125, as assessed by a change in quality of life at  
282 4 weeks after the last (3<sup>rd</sup>) dose of study drug relative to baseline
- 283 • to explore the correlation between pharmacokinetic parameters and drug efficacy
- 284 • to explore the relationship between genetic polymorphisms within the CGRP receptor-  
285 ligand complex (eg, CALCA, CALCB, CALCRL, CRCP, and RAMP) and migraine-  
286 associated genes (eg, PRDM16, AJAP1, TSPAN2, MEF2D, TRPM8, TGFBR2,  
287 PHACTR1, FHL5, C7orf10, MMP16, ASTN2, LRP1, APOA1BP, TBC1D7, FUT9,  
288 STAT6, ATP5B, and MTHFR) and mode-of-action-related pathways versus  
289 hypertension, migraine severity, and safety and efficacy responses
- 290 • to explore the relationship between biofluid bone, angiogenic, and inflammatory  
291 biomarkers with TEV-48125 concentrations and efficacy responses

## 292 2. STUDY DESIGN

### 293 2.1. General Design and Study Schema

294 This is a 16-week, multicenter, randomized, double-blind, placebo-controlled, parallel-group study  
295 to compare the safety, tolerability, and efficacy of 2 dose regimens of sc TEV-48125 and placebo in  
296 adults with EM. The study consists of a screening visit, a 28-day run-in period, and a 12-week (84-  
297 day) treatment period, including a final evaluation at week 12 (end-of-treatment [EOT] visit,  
298 approximately 4 weeks [28 days] after the final dose of study drug).

299 This study will include female and male patients, aged 18 to 70 years, inclusive, with a history of  
300 migraine for at least 12 months and EM (as defined by International Classification of Headache  
301 Disorders, 3<sup>rd</sup> edition [ICHD-3] criteria [[Classification Committee of the IHS, 2013IHS](#)]). The  
302 diagnosis will be prospectively confirmed via a review of headache data recorded daily during a 28-  
303 day run-in period in an electronic headache diary device.

304 Patients using no more than 1 preventive medication at the time of study enrollment will be allowed  
305 to remain on the medication if the medication has at least moderate evidence of efficacy for  
306 migraine ([Silberstein et al 2012](#)). Patients should not be initiating any preventive migraine  
307 medications (presented in protocol Appendix B) at the time of the screening visit, and will not be  
308 allowed to initiate these medications after randomization. A small subgroup of patients  
309 (approximately 30%) will be allowed to use concomitant migraine preventive medications  
310 (presented in protocol Appendix A), and no changes in these medications will be allowed until the  
311 last study assessments are complete. Patients will be allowed to use acute medications to treat acute  
312 migraine attacks, as needed.

313 After completing the informed consent process (screening visit [visit 1]), patients will be screened  
314 for eligibility. Eligible patients will enter a 28-day run-in period. Headache information will be  
315 captured daily throughout study participation using the electronic headache diary device. After  
316 completing the run-in period, patients will be asked to return to the study center on day 0 (visit 2).  
317 Patients who have confirmed EM and meet all other eligibility criteria (including electronic  
318 headache diary compliance criteria during the 28-day run-in period) will be randomly assigned in a  
319 1:1:1 ratio to 1 of 3 treatment groups:

- 320 • monthly sc administration of TEV-48125 at 225 mg
- 321 • sc administration of 675 mg of TEV-48125 at visit 2 followed by monthly sc placebo
- 322 • monthly sc administration of placebo

323 (Note: For this study, monthly dosing refers to dosing approximately every 4 weeks [28 days].)

324 Randomization will be performed using electronic interactive response technology (IRT). Patients  
325 will be stratified based on sex, country, and baseline preventive migraine medication use (yes, no)  
326 to ensure balance for the covariates (treatment group, preventive migraine medication use, country,  
327 and sex). The total number of patients receiving concomitant preventive medication during the  
328 study will not exceed 30% of the total sample size of the study.

329 Blinded treatment will be administered sc once monthly (ie, approximately every 4 weeks) for a  
330 total of 3 doses. First treatment administration will occur at visit 2 (day 0), and additional doses will



331 be administered at visits 3 and 4. Final study assessments will be performed at visit 5 (EOT visit),  
332 approximately 4 weeks after administration of the 3<sup>rd</sup> and final dose of study drug.

333 Headache information will be captured daily during the entire study using an electronic headache  
334 diary device. Assessments of migraine-related disability and change in quality of life (using the  
335 MIDAS questionnaire, 2-item Patient Health Questionnaire (PHQ-2)/9-item Patient Health  
336 Questionnaire (PHQ-9), Migraine-Specific Quality of Life (MSQOL) questionnaire, EuroQol-5  
337 Dimension, 5 response level version (EQ-5D-5L) questionnaire, Patient Global Impression of  
338 Change (PGIC) scale, and Work Productivity and Activity Impairment (WPAI) questionnaire);  
339 safety evaluations; blood draws for pharmacokinetic, immunogenicity, and biomarker analysis; and  
340 urine sampling for biomarker analysis will be performed throughout the study according to the  
341 schedule of assessments (Table 1). In addition, patients who consent to pharmacogenomic  
342 assessment will provide a blood sample for testing.

343 Upon completion of the final study assessments patients who complete all scheduled visits may be  
344 eligible to enter a long-term safety and efficacy study (Study TV48125-CNS-30051), consisting of  
345 a 12-month double-blind treatment period and a 6.5-month follow-up period. Patients receiving  
346 active study drug in the current study will continue receiving the same treatment (ie, monthly sc  
347 TEV-48125 at 225 mg or quarterly sc TEV-48125 at 675 mg), and patients receiving placebo in the  
348 current study will be randomized in a 1:1 ratio to receive monthly sc TEV-48125 at 225 mg or  
349 quarterly sc TEV-48125 at 675 mg during the long-term safety and efficacy study. Patients who  
350 withdraw from the study before completing the 12-week evaluation period will have EOT visit  
351 (visit 5) procedures and assessments performed on the last day they receive the study drug or as  
352 soon as possible thereafter. Those patients who do not enter the long-term safety and efficacy study  
353 for any reason will be offered to enter the long term safety extension for the purpose of evaluating  
354 ADA approximately 7.5 months (225 days [the approximate equivalent of 5 half-lives]) after  
355 administration of the last dose of study drug in this study.

356 The assessments and procedures performed during each study visit are detailed in Table 1. The  
357 study schema is presented in Figure 1.

358 The end of the study is defined as the date the last patient attends the EOT/early withdrawal visit  
359 (visit 5).

360 A total of 768 patients are planned to be randomized in a 1:1:1 ratio (256 patients per treatment  
361 group) to receive 3 monthly sc doses of TEV-48125 at 225 mg, 1 sc dose of TEV-48125 at 675 mg  
362 followed by 2 monthly sc doses of matching placebo, or 3 monthly sc doses of matching placebo.

363 **Figure 1: Overall Study Schema**

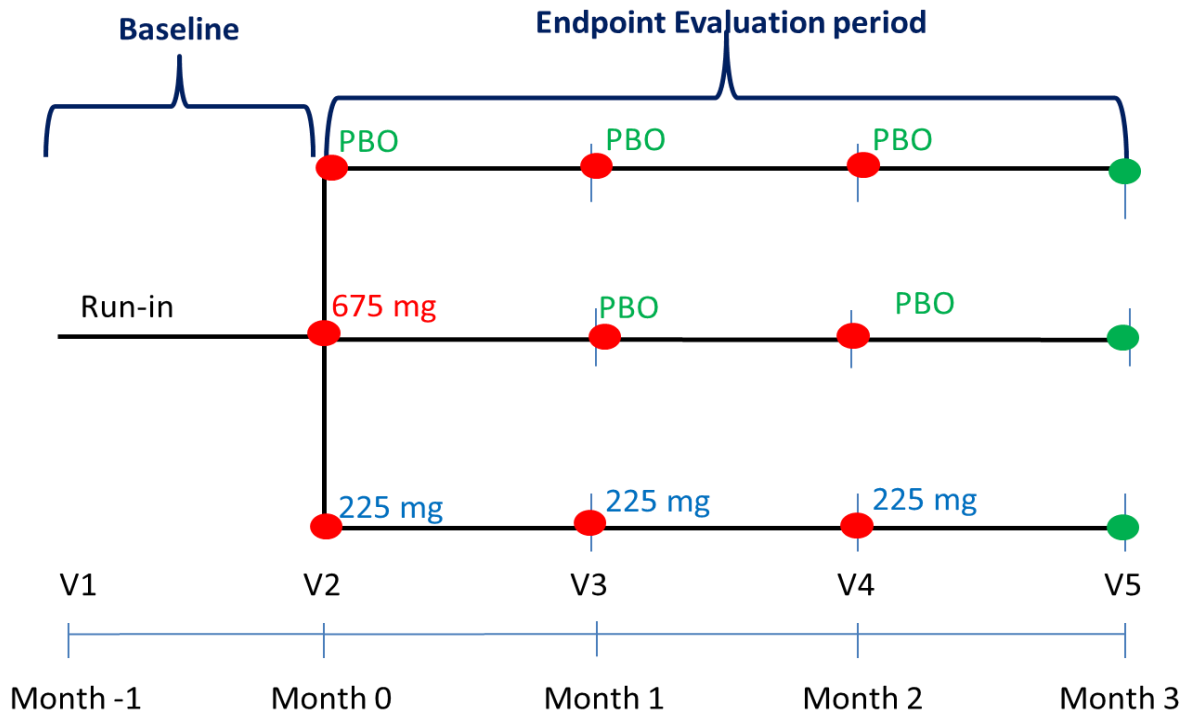

364

365 PBO = placebo; V = visit.

366 Note: Baseline refers to the 28-day run-in period for headache variables and visit 2 (day 0) for all other variables.

367 **Table 1: Study Procedures and Assessments**

| Study period                                                                                  | Pretreatment period (incl. screening visit and run-in period) | Double-blind treatment period   |                         |                         |                                          |
|-----------------------------------------------------------------------------------------------|---------------------------------------------------------------|---------------------------------|-------------------------|-------------------------|------------------------------------------|
|                                                                                               |                                                               | V1                              | V2                      | V3                      | V4                                       |
| Month number                                                                                  | Month -1                                                      | Month 0                         | Month 1                 | Month 2                 | Month 3                                  |
| Procedures and assessments (completed before dosing, when applicable, unless otherwise noted) | Screening days -28 to -1                                      | Baseline dose 1 day 0 (+3 days) | Dose 2 day 28 (±3 days) | Dose 3 day 56 (±3 days) | EOT or early withdrawal day 84 (±3 days) |
| Informed consent                                                                              | X                                                             |                                 |                         |                         |                                          |
| Medical and psychiatric history                                                               | X                                                             |                                 |                         |                         |                                          |
| Prior medication history                                                                      | X                                                             |                                 |                         |                         |                                          |
| Record demographic characteristics                                                            | X                                                             |                                 |                         |                         |                                          |
| Inclusion and exclusion criteria                                                              | X                                                             | X                               |                         |                         |                                          |
| Randomization                                                                                 |                                                               | X                               |                         |                         |                                          |
| Physical examination, including weight and height <sup>a</sup>                                | X                                                             | X                               |                         |                         | X                                        |
| Triplicate 12-lead ECG <sup>b,c</sup>                                                         | X                                                             | X                               |                         |                         | X                                        |
| Vital signs measurement <sup>b</sup>                                                          | X                                                             | X                               | X                       | X                       | X                                        |
| Adverse events <sup>d</sup>                                                                   | X                                                             | X                               | X                       | X                       | X                                        |
| Concomitant medication inquiry                                                                | X                                                             | X                               | X                       | X                       | X                                        |
| Clinical laboratory tests <sup>e</sup>                                                        | X                                                             | X                               | X                       | X                       | X                                        |
| Serum β-HCG test <sup>f</sup>                                                                 | X                                                             |                                 |                         |                         |                                          |
| Urine β-HCG test <sup>f</sup>                                                                 |                                                               | X                               | X                       | X                       | X                                        |
| FSH <sup>g</sup>                                                                              | X                                                             |                                 |                         |                         |                                          |

| Study period                                                                                  | Pretreatment period (incl. screening visit and run-in period) | Double-blind treatment period   |                         |                         |                                          |
|-----------------------------------------------------------------------------------------------|---------------------------------------------------------------|---------------------------------|-------------------------|-------------------------|------------------------------------------|
|                                                                                               |                                                               | V1                              | V2                      | V3                      | V4                                       |
| Month number                                                                                  | Month -1                                                      | Month 0                         | Month 1                 | Month 2                 | Month 3                                  |
| Procedures and assessments (completed before dosing, when applicable, unless otherwise noted) | Screening days -28 to -1                                      | Baseline dose 1 day 0 (+3 days) | Dose 2 day 28 (±3 days) | Dose 3 day 56 (±3 days) | EOT or early withdrawal day 84 (±3 days) |
| Provide electronic headache diary <sup>h</sup>                                                | X                                                             |                                 |                         |                         |                                          |
| Complete electronic headache diary entries <sup>i</sup>                                       | X                                                             |                                 |                         |                         | X                                        |
| Review electronic headache diary                                                              |                                                               | X                               | X                       | X                       | X                                        |
| Return headache diary device                                                                  |                                                               |                                 |                         |                         | X                                        |
| Blood samples for plasma drug concentration <sup>j</sup>                                      |                                                               | X                               | X                       | X                       | X                                        |
| Blood samples for serum ADA assessment <sup>k</sup>                                           |                                                               | X                               | X                       |                         | X                                        |
| Blood sample for pharmacogenomic analysis <sup>l</sup>                                        |                                                               | X                               |                         |                         |                                          |
| Blood collection for serum, plasma, and RNA biomarker analysis                                |                                                               | X                               |                         | X                       | X                                        |
| Urine collection for biomarker analysis                                                       |                                                               | X                               |                         | X                       | X                                        |
| MIDAS questionnaire                                                                           |                                                               | X                               |                         |                         | X                                        |
| PHQ-2/PHQ-9 <sup>m</sup>                                                                      |                                                               | X                               |                         |                         | X                                        |
| MSQOL questionnaire                                                                           |                                                               | X                               | X                       | X                       | X                                        |
| EQ-5D-5L questionnaire                                                                        |                                                               | X                               |                         |                         | X                                        |
| PGIC scale                                                                                    |                                                               |                                 | X                       | X                       | X                                        |
| WPAI questionnaire                                                                            |                                                               | X                               |                         |                         | X                                        |

| Study period                                                                                  | Pretreatment period (incl. screening visit and run-in period) | Double-blind treatment period   |                         |                         |                                          |
|-----------------------------------------------------------------------------------------------|---------------------------------------------------------------|---------------------------------|-------------------------|-------------------------|------------------------------------------|
|                                                                                               |                                                               | V1                              | V2                      | V3                      | V4                                       |
| Month number                                                                                  | Month -1                                                      | Month 0                         | Month 1                 | Month 2                 | Month 3                                  |
| Procedures and assessments (completed before dosing, when applicable, unless otherwise noted) | Screening days -28 to -1                                      | Baseline dose 1 day 0 (+3 days) | Dose 2 day 28 (±3 days) | Dose 3 day 56 (±3 days) | EOT or early withdrawal day 84 (±3 days) |
| eC-SSRS <sup>m</sup>                                                                          |                                                               | X                               | X                       | X                       | X                                        |
| Administration of study drug                                                                  |                                                               | X                               | X                       | X                       |                                          |
| Injection site assessments <sup>o</sup>                                                       |                                                               | X                               | X                       | X                       |                                          |
| Review eligibility for long-term safety study (TV48125-CNS-30051)                             |                                                               |                                 |                         |                         | X                                        |

368 <sup>a</sup> Height will only be obtained at screening.  
 369 <sup>b</sup> Procedure will be performed before other assessments (eg, blood draws and administration of questionnaires).  
 370 <sup>c</sup> Electrocardiograms will be performed in triplicate.  
 371 <sup>d</sup> Inquiries about adverse events will be made before and after study drug administration. Postdose inquiries will be made before the patient leaves the study center.  
 372 <sup>e</sup> Serum chemistry, hematology, coagulation, and urinalysis.  
 373 <sup>f</sup> Women of childbearing potential only.  
 374 <sup>g</sup> Postmenopausal women only.  
 375 <sup>h</sup> Eligible patients will be given an electronic headache diary device and will be trained in its use and compliance requirements on the day of screening.  
 376 <sup>i</sup> Patients will complete electronic headache diary entries about the previous day daily beginning on day -27 through the EOT/early withdrawal visit.  
 377 <sup>j</sup> Blood samples for plasma drug concentration determination will be collected prior to dosing at visits 2, 3, and 4.  
 378 <sup>k</sup> Blood samples for serum ADA assessment will also be collected upon observation of any severe hypersensitivity reaction (eg, anaphylaxis).  
 379 <sup>l</sup> A single blood sample for pharmacogenomic analysis will be collected at visit 2 or any visit thereafter from patients who consent to this procedure. A separate informed consent form for pharmacogenomic sampling must be signed by the patient.  
 380 <sup>m</sup> Patients will respond first to the PHQ-2. They will respond to questions 3 through 9 (unique questions) of the PHQ-9 only if PHQ-2 is positive.  
 381 <sup>n</sup> The eC-SSRS Baseline/Screening version will be completed at visit 2, and the eC-SSRS Since Last Visit version will be completed at all other visits.  
 382 <sup>o</sup> Injection sites will be assessed for erythema, induration, ecchymosis, and pain immediately and 1 hour after study drug administration. If a patient has severe injection site  
 383 induration, erythema, and/or ecchymosis and/or grade 3 (severe) or grade 4 (worst possible) injection site pain at 1 hour after completion of study drug administration, the patient  
 384 will be reassessed 3 hours after study drug administration and hourly thereafter until the reaction/pain is of moderate or less severity.  
 385  
 386 ADA=antidrug antibody; β-HCG=beta-human chorionic gonadotropin; ECG=electrocardiogram; eC-SSRS=electronic Columbia-Suicide Severity Rating Scale;  
 387 EOT=end of treatment; EQ-5D-5L=EuroQol-5 Dimension, 5 response level version; FSH=follicle-stimulating hormone; MIDAS=Migraine Disability  
 388 Assessment; MSQOL=Migraine-Specific Quality of Life; PGIC=Patient Global Impression of Change; PHQ-2=2-item Patient Health Questionnaire;  
 389 PHQ-9=9-item Patient Health Questionnaire; V=visit; WPAI=Work Performance and Activity Impairment.

## 390 **2.2. Primary and Secondary Measures and Endpoints**

### 391 **2.2.1. Primary Efficacy Endpoint**

392 The primary efficacy endpoint is the mean change from baseline (28-day run-in period) in the  
393 monthly average number of migraine days during the 12-week period after the 1<sup>st</sup> dose of study  
394 drug.

### 395 **2.2.2. Secondary Efficacy Endpoints**

396 The secondary efficacy endpoints are as follows:

- 397 • proportion of patients reaching at least 50% reduction in the monthly average number of  
398 migraine days during the 12-week period after the 1<sup>st</sup> dose of study drug
- 399 • mean change from baseline (28-day run-in period) in the monthly average number of  
400 days of use of any acute headache medications during the 12-week period after the  
401 1<sup>st</sup> dose of study drug
- 402 • mean change from baseline (28-day run-in period) in the number of migraine days  
403 during the 4-week period after the 1<sup>st</sup> dose of the study drug
- 404 • mean change from baseline (28-day run-in period) in the monthly average number of  
405 migraine days during the 12-week period after the 1<sup>st</sup> dose of study drug in patients not  
406 receiving concomitant migraine preventive medications
- 407 • mean change from baseline (day 0) in disability score, as measured by the MIDAS  
408 questionnaire, at 4 weeks after administration of the last (3<sup>rd</sup>) dose of study drug

### 409 **2.2.3. Exploratory Efficacy Endpoints**

410 The exploratory efficacy endpoints are as follows:

- 411 • mean change from baseline (28-day run-in period) in the number of headache days of at  
412 least moderate severity during the 12-week period after the 1<sup>st</sup> dose of study drug
- 413 • mean change from baseline (28-day run-in period) in the weekly number of migraine  
414 days during the 4-week period after the 1<sup>st</sup> dose of study drug
- 415 • proportion of patients reaching at least 75% reduction and total (100%) reduction in the  
416 monthly average number of migraine days during the 12-week period after the 1<sup>st</sup> dose  
417 of study drug
- 418 • proportion of patients reaching at least 50% reduction and at least 75% reduction in the  
419 number of migraine days during the 4-week period after the 1<sup>st</sup> dose of study drug for  
420 whom this level of effect is sustained throughout the 12-week period after the 1<sup>st</sup> dose of  
421 study drug
- 422 • mean change from baseline (28-day run-in period) in the monthly average number of  
423 migraine days during the 12-week period after the 1<sup>st</sup> dose of study drug in patients who  
424 used topiramate for migraine in the past

- 425 • mean change from baseline (28-day run-in period) in the number of migraine days  
426 during the 12-week period after the 1<sup>st</sup> dose of study drug for patients who used  
427 onabotulinumtoxinA for migraine in the past
- 428 • mean change from baseline (28-day run-in period) in the number of migraine days  
429 during the 4-week period after the 2<sup>nd</sup> dose of the study drug
- 430 • mean change from baseline (28-day run-in period) in the number of migraine days  
431 during the 4-week period after the last (3<sup>rd</sup>) dose of the study drug
- 432 • mean change from baseline (28-day run-in period) in the monthly average number of  
433 headache days of any severity during the 12-week period after the 1<sup>st</sup> dose of study drug
- 434 • mean change from baseline (28-day run-in period) in the number of headache days of at  
435 least moderate severity during the 4-week period after each dose of study drug
- 436 • mean change from baseline (28-day run-in period) in the weekly number of headache  
437 days of at least moderate severity during the 4-week period after the 1<sup>st</sup> dose of study  
438 drug
- 439 • proportion of patients reaching at least 50% reduction, at least 75% reduction, and total  
440 (100%) reduction in the monthly average number of headache days of at least moderate  
441 severity during the 12-week period after the 1<sup>st</sup> dose of study drug
- 442 • proportion of patients reaching at least 50% reduction and at least 75% reduction in the  
443 number of headache days of at least moderate severity during the 4-week period after the  
444 1<sup>st</sup> dose of study drug for whom this level of effect is sustained throughout the 12-week  
445 period after the 1<sup>st</sup> dose of study drug
- 446 • mean change from baseline (28-day run-in period) in the number of headache days of at  
447 least moderate severity during the 12-week period after the 1<sup>st</sup> dose of study drug for  
448 patients not receiving concomitant preventive migraine medications
- 449 • mean change from baseline (28-day run-in period) in the number of headache days of at  
450 least moderate severity during the 12-week period after the 1<sup>st</sup> dose of study drug for  
451 patients who used topiramate for migraine in the past
- 452 • mean change from baseline (28-day run-in period) in the number of headache days of at  
453 least moderate severity during the 12-week period after the 1<sup>st</sup> dose of study drug for  
454 patients who used onabotulinumtoxinA for migraine in the past
- 455 • mean change from baseline (28-day run-in period) in the monthly average number of  
456 headache hours of any severity during the 12-week period after the 1<sup>st</sup> dose of study  
457 drug
- 458 • mean change from baseline (28-day run-in period) in the monthly average number of  
459 headache hours of at least moderate severity during the 12-week period after the 1<sup>st</sup> dose  
460 of study drug
- 461 • mean change from baseline (28-day run-in period) in the monthly average number of  
462 days of use of migraine-specific acute headache medications (triptans and ergot  
463 compounds) during the 12-week period after the 1<sup>st</sup> dose of study drug

- 464 • mean change from baseline (28-day run-in period) in the monthly average number of  
465 days with nausea or vomiting during the 12-week period after the 1<sup>st</sup> dose of study drug
- 466 • mean change from baseline (28-day run-in period) in the monthly average number of  
467 days with photophobia and phonophobia during the 12-week period after the 1<sup>st</sup> dose of  
468 study drug
- 469 • mean change from baseline (day 0) in quality of life, as measured by the MSQOL  
470 questionnaire, at 4 weeks after administration of the last (3<sup>rd</sup>) dose of study drug
- 471 • mean change from baseline (day 0) in the health status, as measured by the EQ-5D-5L  
472 questionnaire at 4 weeks after administration of the last (3<sup>rd</sup>) dose of study drug
- 473 • mean change from baseline (day 0) in patient depression status, as measured by the  
474 PHQ-2 and PHQ-9, at 4 weeks after administration of the last (3<sup>rd</sup>) dose of study drug
- 475 • mean change from baseline (day 0) in patient work productivity and activity impairment,  
476 as measured by the WPAI questionnaire, at 4 weeks after administration of the last (3<sup>rd</sup>)  
477 dose of study drug
- 478 • assessment of patient satisfaction, as measured by the PGIC scale, at 4 weeks after  
479 administration of the 1<sup>st</sup> dose of study drug, at 4 weeks after the 2<sup>nd</sup> dose of study drug,  
480 and at 4 weeks after the last (3<sup>rd</sup>) dose of study drug

#### 481 **2.2.4. Safety and Tolerability Endpoints**

482 The safety and tolerability endpoints for this study are as follows:

- 483 • occurrence of adverse events throughout the study
- 484 • abnormal standard 12-lead electrocardiogram (ECG) findings
- 485 • changes from baseline in vital signs (systolic and diastolic blood pressure, pulse, oral  
486 temperature, and respiratory rate) measurements
- 487 • changes from baseline in clinical laboratory (serum chemistry, hematology, coagulation,  
488 and urinalysis) test results
- 489 • abnormal physical examination findings
- 490 • abnormal local injection site tolerability findings (ie, erythema, induration, ecchymosis)  
491 and occurrence of injection site pain
- 492 • suicidal ideation and behavior as suggested by the electronic Columbia-Suicide Severity  
493 Rating Scale (eC-SSRS)

#### 494 **2.2.5. Pharmacokinetic/Immunogenicity/Biomarker Endpoints**

##### 495 **2.2.5.1. Pharmacokinetic Endpoints**

496 There are no prespecified pharmacokinetic endpoints.

##### 497 **2.2.5.2. Immunogenicity Endpoint**

498 There are no prespecified immunogenicity endpoints.



### 499 **2.2.5.3. Biomarker Endpoints**

500 The biomarker assessments and endpoints will be provided in a separate document by Personal  
501 Medicine and Pharmacogenomics.

## 502 **2.3. Sample Size and Power Considerations**

503 A total of 768 patients are planned to be randomized in this study to have 675 completers  
504 (225 completers per treatment group); a 12% drop-out rate is anticipated. A sample size of  
505 675 patients (ie, 225 evaluable patients completing the study per treatment group) will provide  
506 90% power to detect a 1.6 difference in migraine days between an active arm and placebo arm at an  
507 alpha level of 0.05, assuming a common standard deviation (SD) of 5.2 days.

## 508 **2.4. Randomization and Blinding**

### 509 **2.4.1. Randomization**

510 Patient randomization codes will be maintained in a secure location within Teva Clinical Supply  
511 Chain. At the time of analysis, when treatment codes are needed, the Teva statistician assigned to  
512 the study will make a request to unblind and will receive the unblinded codes.

### 513 **2.4.2. Blinding/Unblinding**

514 This is a randomized study with stratification based on sex, country, and baseline preventive  
515 migraine medication use (yes, no). Each patient will undergo randomization in a 1:1:1 ratio within  
516 the stratum to which he or she belongs to receive 1 of the 2 TEV-48125 dose regimens or placebo,  
517 as assigned by the IRT. The IRT will manage initial drug supply, maintenance of adequate study  
518 drug supplies on site, and study randomization centrally. At the time of each study visit, the IRT  
519 will be queried, and site personnel will retrieve and administer a 1.5-mL volume from each syringe  
520 contained in the appropriately numbered kit(s).

521 The sponsor, investigators, study staff (except for staff involved in bioanalytical analyses), and  
522 patients will be blinded to treatment assignment. A computer-generated master randomization list  
523 will be provided to drug packaging facilities. Packaging vendor(s) will package active drug and  
524 placebo into single-visit kits according to Good Manufacturing Practice procedures. Kits will be  
525 identical in appearance and contain 1 prefilled syringe with active drug or placebo. Adequate kit  
526 supply for upcoming study visits will be managed by IRT and kept (refrigerated at 2°C to 8°C) on  
527 site.

528 In case of a serious adverse event or pregnancy, or in cases when knowledge of the study drug  
529 assignment is needed to make treatment decisions, the investigator may unblind the patient's drug  
530 assignment as deemed necessary, mainly in emergency situations. Individual treatment codes,  
531 indicating the treatment randomization for each randomized patient, will be available to the  
532 investigator(s) and/or pharmacist(s) at the study center via the IRT, both via telephone and internet.  
533 If possible, the sponsor should be notified of the event prior to breaking of the code. If this is not  
534 possible, the sponsor should be notified immediately afterwards, and the patient's drug code  
535 assignment should not be revealed. Breaking of the treatment code can always be performed by the  
536 site without prior approval by the sponsor.

537 When a blind is broken, the patient will be withdrawn from the study, and the event will be  
538 recorded onto the CRF. The circumstances leading to the breaking of the code should be fully  
539 documented in the investigator's study files and in the patient's source documentation. Treatment  
540 assignment should not be recorded in any study documents or source document.

541 In blinded studies, for adverse events that are defined as: suspected, unexpected, serious, adverse  
542 reaction (SUSAR) (ie, reasonable possibility; see protocol Section 7.1.4), Global Patient Safety and  
543 Pharmacovigilance may independently request that the treatment code be revealed (on a case by  
544 case basis) to comply with regulatory requirements. The report will be provided in an unblinded  
545 manner for regulatory submission. If this occurs, blinding will be maintained for the investigator  
546 and for other personnel involved in the conduct, analysis, and reporting of the data.

## 547 **2.5. Sequence of Planned Analyses**

### 548 **2.5.1. Interim Analyses**

549 No interim analysis is planned for this study.

### 550 **2.5.2. Final Analyses and Reporting**

551 All final, planned analyses identified in this SAP will be performed after the database lock. The  
552 study will not be unblinded until the study database lock.

553 **3. POPULATIONS / ANALYSIS SETS**

554 **3.1. Intent-to-Treat Population**

555 The intent-to-treat (ITT) population will include all randomized patients. In this population,  
556 treatment will be assigned based on the treatment to which patients are randomized, regardless of  
557 which treatment they actually received.

558 **3.2. Safety Population**

559 The safety population will include all patients who receive at least 1 dose of study drug. In this  
560 population, treatment will be assigned based upon the treatment patients actually receive, regardless  
561 of the treatment to which they are randomized. All safety analysis will be based on the safety  
562 population.

563 **3.3. Full Analysis Set**

564 The full analysis set (FAS) will include all patients in the ITT population who receive at least 1  
565 dose of study drug and have at least 10 days of post baseline efficacy assessments on the primary  
566 endpoint. The FAS will be used for all efficacy analysis.

567 **3.4. Per-Protocol Analysis Set**

568 The per-protocol analysis set will consist of all patients who have completed the study without any  
569 violations of the inclusion/exclusion criteria or any violations or omissions of the drug  
570 administration. The efficacy analysis for the primary and secondary endpoints will be repeated for  
571 the per-protocol analysis set.

## 572 4. GENERAL ISSUES FOR DATA ANALYSIS

### 573 4.1. General

574 Descriptive statistics for continuous variables include count (n), mean, SD, standard error (SE),  
575 median, minimum, and maximum. Descriptive statistics for categorical variables include patient  
576 counts and percentages.

577 Summaries of potentially clinically significant abnormal values will include all post-baseline values  
578 (including scheduled, unscheduled, and early termination visits).

### 579 4.2. Specification of Baseline Values

580 Patients will complete electronic headache diary entries daily for 28-day run-in period and enter  
581 headache information (ie, occurrence of headache, duration of headache, maximum severity of  
582 headache, and acute migraine-specific medication use) about the previous day into the electronic  
583 headache diary device. If the run-in period is greater or less than 28 days, the baseline values for  
584 calculating the change from baseline of the monthly values of the efficacy variables will be  
585 normalized to 28 days. The baseline value for calculating change from baseline of the weekly  
586 values will be normalized to 7 days.

587 The efficacy baseline values during the 28-day run-in period derived from the e-diary include

- 588 • total number of migraine days
- 589 • total headache days of at least moderate severity
- 590 • total number of days of use of any acute headache medication
- 591 • total headache days of any severity
- 592 • total number of headache hours of at least moderate severity
- 593 • total number of headache hours of any severity
- 594 • total number of days of use of migraine-specific acute headache medications (triptans  
595 and ergot compounds) for the group of patients who use migraine-specific acute  
596 headache medications at baseline
- 597 • total number of days with nausea or vomiting
- 598 • total number of days with photophobia and phonophobia

599 Other efficacy baseline values that will be measured on day 0 before the 1<sup>st</sup> study drug  
600 administration include

- 601 • disability score, as measured by the MIDAS assessment ([Appendix C](#))
- 602 • quality of life, as measured by the MSQOL questionnaire ([Appendix D](#))
- 603 • health status, as measured by the EQ-5D-5L questionnaire ([Appendix F](#))
- 604 • patient depression status, as measured by the PHQ-2 and the PHQ-9 ([Appendix G](#))

- 605           • patient work productivity and activity impairment, as measured by the WPAI  
606           questionnaire ([Appendix H](#))

607 Other baseline will be the last value prior to the 1<sup>st</sup> dose of study drug.

### 608 **4.3. Region of Pooled Countries**

609 The countries will be pooled to 2 regions as described below in [Table 2](#) for analysis purpose.

610 **Table 2: Pooled Countries by Region**

| Region        | Country                                                               |
|---------------|-----------------------------------------------------------------------|
| United States | United States                                                         |
| Other         | Japan, Czech Republic, Poland, Russia, Canada, Spain, Israel, Finland |

### 611 **4.4. Multiple Comparisons and Multiplicity**

612 A fixed-sequence (hierarchical) testing procedure will be implemented to control the type 1 error  
613 rate at 0.05. The sequence of comparisons will be as follows:

- 614           1. mean change from baseline (28-day run-in period) in the monthly average number of  
615           migraine days during the 12-week period after the 1<sup>st</sup> dose of study drug for the TEV-48125  
616           225/225/225 mg treatment group versus the placebo treatment group
- 617           2. proportion of patients reaching at least 50% reduction in monthly average number of  
618           migraine days during 12-week period after the 1<sup>st</sup> dose of study drug for the TEV-48125  
619           225/225/225 mg treatment group versus the placebo treatment group
- 620           3. mean change from baseline (28-day run-in period) in the monthly average number of  
621           migraine days during the 12-week period after the 1<sup>st</sup> dose of study drug for the TEV-48125  
622           675 mg/placebo/placebo treatment group versus the placebo treatment group
- 623           4. mean change from baseline (28-day run-in period) in the number of migraine days during the  
624           4-week period after the 1<sup>st</sup> dose of the study drug for the TEV-48125 675  
625           mg/placebo/placebo treatment group versus the placebo treatment group
- 626           5. proportion of patients reaching at least 50% reduction in the monthly number of migraine  
627           days during 12-week period after the 1<sup>st</sup> dose of study drug for the TEV-48125 675  
628           mg/placebo/placebo treatment group versus the placebo treatment group
- 629           6. mean change from baseline (28-day run-in period) in the monthly average number of days of  
630           use of any acute headache medications during the 12-week period after the 1<sup>st</sup> dose of the  
631           study drug for the TEV-48125 225/225/225 mg treatment group versus the placebo  
632           treatment group
- 633           7. mean change from baseline (28-day run-in period) in the monthly average number of days of  
634           use of any acute headache medications during the 12-week period after the 1<sup>st</sup> dose of study  
635           drug for the TEV-48125 675 mg/placebo/placebo treatment group versus the placebo  
636           treatment group

- 637 8. mean change from baseline (28-day run-in period) in the number of migraine days during the  
638 4-week period after the 1<sup>st</sup> dose of the study drug for the TEV-48125 225/225/225 mg  
639 treatment group versus the placebo treatment group
- 640 9. mean change from baseline (day 0) in disability score, as measured by the MIDAS  
641 questionnaire, at 4 weeks after administration of the last (3<sup>rd</sup>) dose of study drug for the  
642 TEV-48125 225/225/225 mg treatment group versus the placebo treatment group
- 643 10. mean change from baseline (day 0) in disability score, as measured by the MIDAS  
644 questionnaire, at 4 weeks after administration of the last (3<sup>rd</sup>) dose of study drug for the  
645 TEV-48125 675 mg/placebo/placebo treatment group versus the placebo treatment group
- 646 11. mean change from baseline (28-day run-in period) in the monthly average number of  
647 migraine days during the 12-week period after the 1<sup>st</sup> dose of study drug for the TEV-48125  
648 225/225/225 mg treatment group versus the placebo treatment group in patients not  
649 receiving concomitant migraine preventive medications
- 650 12. mean change from baseline (28-day run-in period) in the monthly average number of  
651 migraine days during the 12-week period after the 1<sup>st</sup> dose of study drug for the TEV-48125  
652 675 mg/placebo/placebo treatment group versus the placebo treatment group in patients not  
653 receiving concomitant migraine preventive medications

654 If the resulting 2-sided p-value from the first comparison is  $\leq 0.05$ , then the next comparison of  
655 interest will be interpreted inferentially at the alpha level of 0.05. This process will continue either  
656 until all comparisons of interest are interpreted inferentially or until the point at which the resulting  
657 2-sided p value for a comparison of interest is  $>0.05$ . At the point where  $p > 0.05$ , no further  
658 comparisons will be interpreted inferentially.

#### 659 **4.5. Handling Withdrawals and Missing Data**

660 If a patient has  $\geq 10$  days of the e-diary data after 1<sup>st</sup> dose of the study drug, his/her monthly average  
661 number of days/hours of efficacy variables *during the 12-week period* or monthly number of  
662 days/hours of efficacy variables *during the 4-week period* will be prorated to **28** days.

663 Multiple imputation (MI) method will be applied on the primary variable as sensitivity analyses.  
664 The methods will be described in detail in Section 6.2.3.

665 A patient's monthly number of days/hours of efficacy variables *during the 4-week period* after each  
666 dose of study drug will be calculated for months 1, 2, and 3. If a patient has missing diary days in a  
667 month, the following method will be used to handle the missing data.

- 668 • If the patient has 10 or more days of e-diary data for a month, the monthly number of  
669 days/hours of efficacy variables will be prorated to **28** days for that month.
- 670 • If the patient has less than 10 days of e-diary data for a month, the monthly number of  
671 days/hours of efficacy variables will be considered as missing.

672 The weekly number of migraine days and headache days of at least moderate severity will be  
673 calculated for the patients' first 28 calendar days of diary data after the 1<sup>st</sup> dose of study drug. Each  
674 week is defined as 7 calendar days with week 1 counted from the 1<sup>st</sup> dose date. If a patient has  
675 missing diary days in a week, the following method will be used to handle the missing data.

676           • If the patient has  $\geq 3$  days of e-diary data for a week, the weekly number of days of  
677 efficacy variables will be prorated to 7 days for that week.

678           • If the patient has  $< 3$  days of e-diary data for a week, the weekly number of days of  
679 efficacy variables will be considered as missing for that week.

680 The handling of missing questionnaire items for the MSQOL questionnaire ([Appendix D](#)) is  
681 discussed in [Appendix E](#): scoring instruction for MSQOL.

#### 682 **4.6. Study Days and Visit Windows**

683 Study days will be numbered relative to the 1<sup>st</sup> day of study drug administration. The start of  
684 treatment (visit 2 or day 1) is defined as the date on which a patient takes the 1<sup>st</sup> dose of study drug,  
685 as recorded on the study drug administration CRF. Days will be numbered relative to study drug  
686 start (ie, ..., -2, -1, 1, 2, ...; with day 1 being the start of study drug and day -1 being the day before  
687 the start of study drug).

688 The 4-week (28-day) visit windows for the e-diary based efficacy endpoints will be determined  
689 based on the actual dosing day. The run-in phase is defined as day -28 to -1 before the 1<sup>st</sup> injection  
690 on day 1. Treatment phase including month 1, 2 and 3 is from the beginning of the 1<sup>st</sup> injection of  
691 study drug to visit 5/day 84 or the end of treatment visit. The 3-month visit windows are separated  
692 by each dosing date/time. Month 1 is from the date/time of the 1<sup>st</sup> dose of study drug administration  
693 on day 1 to the date/time just before the 2<sup>nd</sup> dose. Month 2 is from the date/time of the 2<sup>nd</sup> dose to  
694 the date/time just before the 3<sup>rd</sup> dose. Month 3 is from the date/time of the 3<sup>rd</sup> dose to the end of  
695 the study on day 84 approximately.

696 Throughout this document, all by month efficacy summaries for the headache data will refer to  
697 these visit windows.

698 The weekly (7-day) windows for calculating the weekly efficacy endpoints for the first 28 days  
699 will be determined based on the 1<sup>st</sup> dosing day. The first week is from day 1 to day 7, the second  
700 week is from day 8 to day 14, the third week is from day 15 to day 21, and the fourth week is from  
701 day 22 to day 28. Only the days between the first and the second dose will be included.

702 For all other by-visit summaries, if there are multiple assessments at a postbaseline visit then the  
703 last non-missing assessment at that visit will be used for the summary. This includes assessments at  
704 the scheduled and unscheduled visits.

705 Endpoint for analyses and summaries is the last observed postbaseline data. For patients who  
706 withdraw from the study, data at the early termination visit will be excluded from the by-visit  
707 summaries but will be included in the endpoint summaries.

## 708 **5. STUDY POPULATION SUMMARY**

### 709 **5.1. General**

710 The ITT population will be used for all study population summaries unless otherwise noted.  
711 Summaries will be presented by treatment group, all TEV-48125 and overall unless otherwise  
712 noted.

713 For continuous variables, descriptive statistics (n, mean, SD, SE, median, minimum, and maximum)  
714 will be provided. For categorical variables, patient counts and percentages will be provided.

715 Categories for missing data will be presented if necessary.

### 716 **5.2. Patient Disposition**

717 Patients screened, screening failures, and the reasons the patients were not randomized will be  
718 summarized only for the overall group using patient counts.

719 Patients randomized (ie, in the ITT set), patients randomized but not treated, patients in the safety,  
720 full analysis set and per-protocol population, patients who complete the study, and patients who  
721 withdraw from the study will be summarized using descriptive statistics. Patients who withdraw  
722 from the study will also be summarized using descriptive statistics by reason for withdrawal. The  
723 denominator for calculating the percentages will be the number of ITT population.

### 724 **5.3. Demographics and Baseline Characteristics**

725 The demographic data including date of birth (or year of birth), sex, country, ethnicity and race will  
726 be collected at the screening after the patient signs informed consent. Patient's demographics and  
727 baseline characteristics including age, sex, country, ethnicity and race, weight, height, and body  
728 mass index, years of migraine, concomitant preventive medication use for migraine, use of  
729 topiramite or onabotulinumtoxinA for migraine in the past, and any triptans/ergots during baseline  
730 will be summarized for ITT population.

731 The baseline e-diary efficacy variables listed in Section 4.2, baseline MIDAS scores and MSQOL  
732 scores will be summarized by treatment group for the ITT population.

733 For continuous variables, treatment groups will be compared using an analysis of variance with  
734 treatment as a factor. For categorical variables, treatment groups will be compared using a  
735 Pearson's chi-square test (or Fisher's exact test if cells sizes are too small).

### 736 **5.4. Medical History**

737 All medical history abnormalities will be coded using the Medical Dictionary for Regulatory  
738 Activities (MedDRA). The incidence of medical history abnormalities will be summarized by  
739 system organ class (SOC) and preferred term (PT). Patients are counted only once in each SOC and  
740 only once in each PT.



741 **5.5. Prior Medications or Therapy**

742 All prior medications or therapy will be coded using the World Health Organization dictionary of  
743 medical codes (WHO Drug). The incidence of prior medications or therapy will be summarized  
744 using descriptive statistics by therapeutic class and PT. Patients are counted only once in each  
745 therapeutic class category, and only once in each PT category. Prior medications will include all  
746 medications taken prior to the 1<sup>st</sup> study drug treatment.

747 The subset of prior medications will be summarized for the following categories.

- 748 • preventive migraine medication
- 749 • triptans and ergots
- 750 • non-steroidal anti-inflammatory drugs (NSAIDs) for migraine/headache
- 751 • NSAIDs for reasons other than migraine/headache
- 752 • opioids for migraine/headache
- 753 • opioids for reasons other than migraine/headache
- 754 • other

755 **5.6. Electrocardiography**

756 Electrocardiogram findings (normal, abnormal, and missing) at baseline will be summarized using  
757 descriptive statistics.

758 **5.7. Physical Examinations**

759 Physical examinations results will be listed. Patients with at least 1 abnormal finding (overall) and  
760 abnormal findings for each category will be summarized.

761 **5.8. Protocol Violations**

762 Patients with at least 1 protocol violation will be summarized for each category using descriptive  
763 statistics.

764 **5.9. Childbearing Potential**

765 All patients must be of nonchildbearing potential as defined in protocol Section 4.1. Information  
766 related to childbearing potential will be collected and listed.

767

768

## 769 6. EFFICACY ANALYSIS

### 770 6.1. General

771 The efficacy data for this study consist of headache related questions responses (e.g., occurrence of  
772 headache, duration of headache in each day, maximum severity of headache, and acute migraine-  
773 specific medication use) collected daily using an electronic headache diary device.

774 In addition, the following questionnaires will be used for the assessments of migraine impairment,  
775 quality of life and satisfaction of treatment etc. during the study (See [Table 1](#)) for the schedule of  
776 the assessment).

- 777 • migraine disability assessment test (see [Appendix C](#))
- 778 • migraine-specific quality of life, as measured by the MSQOL questionnaire (see  
779 [Appendix D](#))
- 780 • health status, as measured by the EQ-5D-5L questionnaire (see [Appendix F](#))
- 781 • patient depression status, as measured by the PHQ-2 and the PHQ-9 (see [Appendix G](#))
- 782 • patient work productivity and activity impairment, as measured by the WPAI  
783 questionnaire (see [Appendix H](#))
- 784 • assessment of patient satisfaction, as measured by the PGIC scale (see [Appendix I](#))

785 The **monthly average number of days or hours** of efficacy variables (e.g. migraine days, days of  
786 headache with at least moderate severity, days of headache with any severity, total hours of  
787 headache with any severity, total hours of headache with at least moderate severity, days of use of  
788 any acute headache medications, days with nausea or vomiting, days with photophobia and  
789 phonophobia etc.) **during the 12-week period** after the 1<sup>st</sup> dose of study drug will be derived and  
790 normalized to **28** days equivalent using the following formula.

$$\frac{\sum \text{Days or hours of efficacy variable over the 12 week period}}{\sum \text{Days with assessments recorded in the eDiary for the 12 week period}} \times 28 \quad (1)$$

791 The **monthly number of days or hours** of efficacy variables **during a 4-week period** after each dose  
792 will be derived and normalized to **28** days equivalent using the following formula, where monthly  
793 data separated by each visit of study drug dosing will be used.

$$\frac{\sum \text{Days or hours of efficacy variable during the 4 week period}}{\sum \text{Days with assessments recorded in the eDiary for the 4 week period}} \times 28 \quad (2)$$

794 The **baseline values** will be calculated using all data collected in the run-in period, i.e.,

$$\frac{\sum \text{Days or hours of efficacy variable during the run – in period}}{\sum \text{Days with assessments recorded in the eDiary for the run – in period}} \times 28 \quad (3)$$

795 The **percentage of reduction** in the monthly average number of an efficacy variable will be  
796 calculated as

$$\frac{\text{baseline value} - \text{postbaseline value}}{\text{baseline value}} \times 100\% \quad (4)$$

797 where the baseline value is calculated by formula (3) and the postbaseline value in the equation is  
 798 calculated by formula (1) for the variables *during the 12-week period* or by formula (2) for the  
 799 variables *during the 4-week period* after each dose for months 1, 2 and 3.

800 The *baseline values* for calculating the change from baseline of the weekly number of days of the  
 801 efficacy variables will use all data collected in the run-in period and be calculated as

$$\frac{\sum \text{Days of efficacy variable during the run} - \text{in period}}{\sum \text{Days with assessments recorded in the eDiary for the run} - \text{in period}} \times 7 \quad (5)$$

802 The *weekly number of days* of efficacy variables (e.g., days of headache with at least moderate  
 803 severity, migraine days) for each week during the 4-week period after the 1<sup>st</sup> dose of study drug will  
 804 be derived and normalized to 7 days equivalent using the following formula.

$$\frac{\sum \text{Days of efficacy variable during the 7 days period}}{\sum \text{Days with assessments recorded in the eDiary for the 7 days period}} \times 7 \quad (6)$$

805 The FAS will be used for all efficacy analyses. Summaries will be presented by treatment group as  
 806 randomized, unless otherwise noted. Descriptive statistics for all efficacy data will be presented by  
 807 month (or week) or visit as appropriate and over 12-week period.

808 The primary and secondary endpoints analysis listed in Section 4.4 will be repeated for the per-  
 809 protocol analysis set.

## 810 **6.2. Primary Efficacy Variable(s) and Analysis**

811 For the purpose of this study, a migraine day is endorsed when at least 1 of the following situations  
 812 occur:

- 813 • A calendar day (0:00 to 23:59) demonstrating at least 2 consecutive hours of a headache  
 814 endorsing criteria for migraine with or without aura
- 815 • A calendar day (0:00 to 23:59) demonstrating at least 2 consecutive hours of a headache  
 816 endorsing criteria for probable migraine, a migraine subtype where only 1 migraine  
 817 criterion is missing
- 818 • A calendar day (0:00 to 23:59) demonstrating a headache of any duration that was  
 819 treated with migraine specific medications (triptans and ergot compounds)

820 The derivation logic is presented in [Appendix B](#).

### 821 **6.2.1. Variable Definition**

822 The primary efficacy variable is the change from baseline in the monthly average number of  
 823 migraine days *during the 12-week period* after the 1<sup>st</sup> dose of study drug. The baseline values will  
 824 be derived using formula (3). The postbaseline values will be derived using formula (1), and *the*  
 825 *change* is calculated as *postbaseline value – baseline value*.

826

## 827 **6.2.2. Primary Analysis**

828 The hypothesis testing for the primary analysis is

$$829 \quad H_o : \delta_1 = \delta_2 \quad vs \quad H_a : \delta_1 \neq \delta_2$$

830 where  $\delta_1$  and  $\delta_2$  are the estimates of mean change from baseline in the monthly average number of  
 831 migraine days for the TEV-48125 treatment group and the placebo group respectively. The  
 832 estimated difference of each TEV-48125 dose vs. placebo will be tested following the pre-specified  
 833 fixed sequence as specified in Section 4.4.

834 An analysis of covariance (ANCOVA) method will be applied for the primary analysis. The model  
 835 will include treatment, sex, region (Table 2), and baseline preventive migraine medication use  
 836 (yes/no) as fixed effects; the baseline number of migraine days and years since onset of migraine as  
 837 covariates. The least square (LS) means for the treatment groups, LS mean and corresponding 95%  
 838 confidence intervals for the treatment differences (TEV-48125 – placebo), and associated p-value  
 839 will be provided.

840 The following sample SAS code pertains to the primary efficacy analysis.

```
841     ODS OUTPUT DIFFS=XXX LSMEANS=XXX TESTS3=XXX;
842     PROC MIXED DATA=XXX;
843         CLASS TREAT SEX BMU REGION;
844         MODEL CHG=BASE YOD BMU SEX TREAT REGION/S;
845         LSMEANS TREAT/PDIFF CL ALPHA=0.05;
846     RUN;
```

847 The normality of the residuals from the ANCOVA model will be checked using Shapiro Wilk's  
 848 normality test. In case that the Shapiro Wilk's test has a p value  $\leq 0.01$ , Wilcoxon rank-sum test  
 849 will be conducted as the primary analysis using SAS procedure NPAR1WAY for each active  
 850 treatment group and placebo group. P value based on normal approximation from this procedure  
 851 will be selected for the treatment comparison. The ANCOVA analysis will be performed as a  
 852 supportive analysis.

## 853 **6.2.3. Sensitivity Analysis**

### 854 **6.2.3.1. MMRM Analysis**

855 A mixed-effects repeated measures (MMRM) analysis model will be implemented to estimate the  
 856 mean change from baseline in the monthly average number of migraine days for the overall 3  
 857 months treatment period and by each month to support the primary analysis.

858 Each patient's monthly number of migraine days *during the 4-week period* for month 1, month 2  
 859 and month 3 will be calculated by formula (2) in Section 6.1 based on the e-diary responses for that  
 860 month. If a patient is early terminated or has intermittent missing days and has less than 10 days of  
 861 e-diary entries for a month, that month's value will be considered as missing as described  
 862 in Section 4.5.

863 The MMRM model will include baseline value, treatment, sex, region, baseline preventive migraine  
 864 medication use (yes/no), years since onset of migraines, month and treatment-by-month interaction  
 865 as fixed effects, and patient in the repeated statement as a random effect. The unconstructed  
 866 covariance structure will be used for the repeated observations within a patient. LS means for the  
 867 treatment groups, LS means for the treatment differences (TEV-48125 - placebo), and  
 868 corresponding 95% confidence intervals and associated p-values will be calculated by month and  
 869 for the overall treatment period.

870 The following SAS code pertains to the MMRM analysis.

```
871     ODS OUTPUT DIFFS=XXX LSMEANS=XXX TESTS3=XXX;
872     PROC MIXED DATA=XXX METHOD=REML;
873         CLASS USUBJID MONTH TREAT SEX BMU REGION;
874         MODEL CHG=BASE YOD BMU SEX TREAT MONTH TREAT*MONTH/S;
875         REPEATED MONTH/SUBJECT=USUBJID TYPE=UN R;
876         LSMEANS TREAT TREAT*MONTH/PDIFF CL ALPHA=0.05;
877     RUN;
```

878 The LS means  $\pm$ SE of monthly change from baseline values estimated by MMRM will be plotted  
 879 by month for each treatment group.

#### 880 **6.2.3.2. Analysis with Multiple Imputation Method**

881 Multiple imputation (MI) method will be applied to impute the monthly missing data. The data will  
 882 be processed by the following steps.

- 883 • If a patient has partial e-diary data for a month, ie, <10 days of data, that month value  
 884 will be considered missing before the MI procedure.
- 885 • For the patients in the active treatment group who are early terminated with reasons of  
 886 adverse event or lack of efficacy, they will be assigned to placebo group so their missing  
 887 values will be imputed using data from the placebo treated patients
- 888 • Run SAS PROC MI procedure to create 10 complete datasets.
- 889 • Within each imputed data set, for a patient who has partial, say X days ( $X < 10$ ), e-diary  
 890 data in a month, the monthly value will be replaced by  
 891 
$$\sum(\text{observed migraine days}) + (28 - X) * \text{imputed value} / 28$$
- 892 • The monthly average number of migraine days *during the 12-week period* after the 1<sup>st</sup>  
 893 dose of study drug will be the average of month 1, month 2 and month 3 values.

894 Each dataset will be analyzed using the same ANCOVA model as described in Section 6.2.2. The  
 895 LS means and standard errors from each analysis will be output to a SAS data set. SAS  
 896 MIANALYZE procedure will be used to generate the final LS means ( $\pm$ SE) for the treatment  
 897 groups and the treatment differences (TEV-48125 - placebo) as well as p-values associated with  
 898 treatment differences. The 95% confidence intervals for the treatment differences will also be  
 899 constructed.

### 900 **6.3. Secondary Efficacy Variables and Analysis**

901 The secondary efficacy endpoints are as follows:

- 902 • proportion of patients reaching at least 50% reduction in the monthly average number of  
903 migraine days during the 12-week period after the 1<sup>st</sup> dose of study drug
- 904 • mean change from baseline (28-day run-in period) in the monthly average number of  
905 days of use of any acute headache medications during the 12-week period after the  
906 1<sup>st</sup> dose of study drug
- 907 • mean change from baseline (28-day run-in period) in the number of migraine days  
908 during the 4-week period after the 1<sup>st</sup> dose of the study drug
- 909 • mean change from baseline (28-day run-in period) in the monthly average number of  
910 migraine days during the 12-week period after the 1<sup>st</sup> dose of study drug in patients not  
911 receiving concomitant migraine preventive medications
- 912 • mean change from baseline (day 0) in disability score, as measured by the MIDAS  
913 questionnaire, at 4 weeks after administration of the last (3<sup>rd</sup>) dose of study drug

#### 914 **6.3.1. Variable Definition**

##### 915 **6.3.1.1. Electronic Headache Diary Data**

916 The change from baseline in the monthly average number of days of secondary efficacy variables  
917 (e.g. migraine days, days of use of any acute headache medications etc.) *during the 12-week period*  
918 after the 1<sup>st</sup> dose of study drug will be derived similar to the primary variables using the e-diary data  
919 collected through the corresponding headache diary questions ([Appendix A](#)). The baseline values  
920 and the postbaseline values will be calculated using formula (3) and (1) respectively. *The change*  
921 is calculated as *postbaseline value – baseline value*.

922 The percent reduction in the monthly average number of migraine days *during the 12-week period*  
923 after the 1<sup>st</sup> dose of study drug will be calculated by formula (4) in Section 6.1. The patient is  
924 considered as a responder if the percent reduction is 50% or more. If a patient is early discontinued  
925 from the study, he/she will be counted as a non-responder.

926 The change from baseline (run-in period) in the number of migraine days *during the 4-week period*  
927 after the 1<sup>st</sup> dose of study drug will be derived similar to the primary endpoint using only the 1<sup>st</sup>  
928 month diary data.

##### 929 **6.3.1.2. Migraine Disability Assessment (MIDAS)**

930 The MIDAS questionnaire is a 5-item instrument developed to assess headache-related disability  
931 based on lost days of activity in 3 domains (work, household work, and nonwork) over the previous  
932 3 months. Patients will complete the MIDAS questionnaire at baseline (visit 2) and the EOT visit  
933 (visit 5). The total score, ie, the sum of the first 5 questions, is used for grading of disability, with  
934 scores of 0 to 5, 6 to 10, 11 to 20, and  $\geq 21$  interpreted as disability grades 1 (little or no disability),  
935 2 (mild disability), 3 (moderate disability), and 4 (severe disability), respectively.

### 936 **6.3.2. Analysis of Secondary Efficacy Variables**

937 An ANCOVA method, which is similar to the primary analysis setup, will be used for the analysis  
938 of the mean change from baseline in the monthly average number of days of secondary efficacy  
939 variables *during the 12-week period* derived from headache diary data. The model will include  
940 treatment, sex, region, and baseline preventive migraine medication use (yes/no) as fixed effects;  
941 the baseline values and years since onset of migraines as covariates. The LS means for the treatment  
942 groups, LS means and 95% confidence intervals for the treatment differences (TEV-48125 –  
943 placebo), and associated p-values will be provided.

944 If a patient has less than 10 days of e-diary data entries after the 1<sup>st</sup> dose of study drug, the missing  
945 data handling method for the primary variable discussed in Section 6.2.1 will be applied for the  
946 monthly average number of days of secondary efficacy variables *during the 12-week period*.

947 Similar to the sensitivity analysis for the primary efficacy variable described in Section 6.2.3.1 an  
948 MMRM model will be implemented to estimate the mean change from baseline for the following  
949 endpoint by month and for overall 3 months after the 1<sup>st</sup> dose of study drug.

- 950 • mean change from baseline (28-day run-in period) in the monthly average number of  
951 days of use of any acute headache medications

952 LS means for the treatment groups, LS mean and corresponding 95% confidence intervals for the  
953 treatment differences (TEV-48125 - placebo), and associated p-values will be calculated by month  
954 and for the overall treatment period.

955 The LS means  $\pm$ SE of e-diary efficacy variables estimated by MMRM will be plotted by month for  
956 each treatment group.

957 Cochran Mantel-Haenszel test stratified by baseline preventive migraine medication use (yes/no)  
958 will be used for analyzing the proportion of patients reaching at least 50% reduction in the monthly  
959 average number of migraine days during the 12-week period after the 1<sup>st</sup> dose of study drug. The  
960 SAS Proc FREQ will be used to carry out this analysis.

961 The change from baseline values in the MIDAS total scores will be analyzed using the same  
962 ANCOVA method as described above.

963 Patients not receiving concomitant preventive medication constitute the sub-population who don't  
964 take any preventive migraine medications listed in APPENDIX B of the protocol during the study,  
965 ie, with baseline preventive migraine medication use = No.

966 For all relevant secondary endpoints, the normality of the residuals from each ANCOVA model  
967 will be checked using Shapiro Wilk's normality test. In case that the Shapiro Wilk's test has a p  
968 value  $\leq 0.01$ , Wilcoxon rank-sum test will be conducted as the primary analysis. The ANCOVA  
969 analysis will be considered as a supportive analysis.

## 970 **6.4. Exploratory Efficacy Variables and Analysis**

971 The exploratory efficacy endpoints are described in Section 2.2.3.

### 972 **6.4.1. Variable Definition**

#### 973 **6.4.1.1. Electronic Headache Diary Data**

974 A headache day of at least moderate severity will be defined as a calendar day (00:00 to 23:59)  
975 where the patient reports:

- 976 • a day with headache pain that lasts  $\geq 4$  hours with a peak severity of at least moderate  
977 severity
- 978 or
- 979 • a day when the patient used acute migraine-specific medication (triptans or ergots) to  
980 treat a headache of any severity or duration

981 The percent reduction in the monthly average number of migraine days during the 12-week period  
982 after the 1<sup>st</sup> dose of study drug will be calculated by formula (4) in Section 6.1. The patient is  
983 considered as a responder reaching 50%, 75% or 100% reduction if his/her percent reduction is  
984 50% or more, 75% or more, or 100% respectively. Similar definition will be applied to calculate the  
985 proportion of patients reaching at least 50%, 75% or 100% reduction in the monthly average  
986 number of headache days of at least moderate severity during the 12-week period after the 1<sup>st</sup> dose  
987 of study drug. If a patient is early discontinued from the study, he/she will be counted as a non-  
988 responder.

989 The percent reduction in the monthly number of migraine days during the 4-week period after each  
990 dose for months 1, 2, and 3 will be calculated by formula (4) where the postbaseline value will be  
991 the number of headache days of at least moderate severity prorated to 28 days for month 1, month  
992 2, and month 3, respectively. If the patient has 50% reduction or more in month 1, he/she will be  
993 considered responder during the 4-week period after 1<sup>st</sup> dose of study drug. In addition if the patient  
994 also has 50% reduction or more in month 2 and 3, he/she is a responder for months 2 and 3, and the  
995 level of effect is sustained throughout the 12-week period after the 1<sup>st</sup> dose of study drug for this  
996 patient. Similar definition will be applied to calculate the proportion of sustained responders  
997 reaching at least 75% reduction. The proportion of sustained responders reaching at least 50% and  
998 75% reduction in the number of headache days of at least moderate severity will be derived  
999 similarly.

1000 The headache day of any severity will be defined as a calendar day (00:00 to 23:59) with headache  
1001 pain that lasts  $\geq 4$  hours of any severity or a day when the patient used acute migraine-specific  
1002 medication (triptans or ergots) to treat a headache of any severity or duration.

1003 The change from baseline in the monthly average number of days or hours of exploratory efficacy  
1004 variables (e.g. days with at least moderate severity, days with any severity, total hours of headache  
1005 with at least moderate severity, total hours of headache with any severity, days of use of migraine-  
1006 specific acute medications, days with nausea or vomiting, days with photophobia and phonophobia  
1007 etc.) *during the 12-week period* after the 1<sup>st</sup> dose of study drug will be derived similar to the  
1008 primary variables using the e-diary data collected through the corresponding headache diary  
1009 questions (Appendix A). The baseline values and the postbaseline values will be derived using



1010 formula (3) and (1) respectively, and *the change* is calculated as *postbaseline value – baseline*  
1011 *value*.

1012 The change from baseline in the monthly number of days or hours of exploratory efficacy variables  
1013 (e.g. days of headache with at least moderate severity, days of headache with any severity, total  
1014 hours of headache with at least moderate severity, total hours of headache with any severity, days of  
1015 use of migraine-specific acute medications, days with nausea or vomiting, days with photophobia  
1016 and phonophobia etc.) *during the 4 week period* after the each dose of study drug will be calculated  
1017 using formula (2) using the month 1, month 2 and month 3 diary data respectively.

1018 The change from baseline in weekly number of headache days of at least moderate severity or  
1019 migraine days for week 1 (Day 1-7), week 2 (Day 8-14), week 3 (Day15-21) and week 4 (Day 22-  
1020 28) after the 1<sup>st</sup> dose of study drug will be derived using the 1<sup>st</sup> 28-day diary data. The baseline  
1021 values and the postbaseline values will be derived using formula (5) and (6) in Section 6.2.1  
1022 respectively, and *the change* is calculated as *postbaseline value – baseline value*.

#### 1023 **6.4.1.2. Migraine-Specific Quality of Life**

1024 The 14-item MSQOL (see [Appendix D](#)) questionnaire is designed to measure how migraines affect  
1025 and/or limit daily functioning across three domains: Role Function-Restrictive domain comprising 7  
1026 items assessing how migraines limit one’s daily social and work-related activities; Role Function-  
1027 Preventive domain comprising 4 items assessing how migraines prevent these activities, and  
1028 Emotional Function domain comprising 3 items assessing the emotions associated with migraines.  
1029 Raw dimension scores are computed as a sum of item responses and rescaled to a 0 to 100 scale  
1030 such that higher scores indicate better quality of life. [Appendix E](#) provides the scoring instructions  
1031 on how to rescale the raw score to the scales that will be used for analysis.

#### 1032 **6.4.1.3. EuroQol-5 Dimension Questionnaire**

1033 The EQ-5D-5L questionnaire ([Appendix F](#)) is a standardized questionnaire that assesses overall  
1034 state of health. The EQ-5D-5L consist of 2 parts. In part 1, patients rate their health state in  
1035 5 domains: mobility, self-care, usual activities, pain/discomfort, and mood, using a scale of 1 to 5  
1036 where 1 = no problems, 2 = slight problems, 3 = moderate problems, 4 = severe problems, and 5 =  
1037 extreme problems. In part 2, patients rate their health state on a 100 mm visual analog scale; a  
1038 rating of 0 represents the worst imaginable health state, and a rating of 100 represents the best  
1039 imaginable health state.

#### 1040 **6.4.1.4. Patient Health Questionnaire**

1041 The PHQ ([Appendix G](#)) is a 9-item questionnaire with each item corresponding to 1 criterion of the  
1042 Diagnostic and Statistical Manual for Mental Disorders 4<sup>th</sup> edition diagnostic criteria for major  
1043 depressive disorder. Each of the items is scored on a scale of 0 (“not at all”), 1 (“several days”), 2  
1044 (“more than half the days”), and 3 (“nearly every day”) based on the frequency of symptoms during  
1045 the past 2 weeks ([Spitzer et al 1999](#)). The PHQ-2 was developed from the PHQ-9 to rapidly screen  
1046 for depression and consists of the first 2 questions of the PHQ-9. The PHQ-2 and the PHQ-9 are  
1047 validated measures for detecting and monitoring depression, anxiety, and somatization ([Kroenke et](#)  
1048 [al 2010](#)).

1049 Patients will complete the PHQ-2 at baseline (visit 2) and the EOT visit (visit 5). If the PHQ-2 is  
 1050 positive (ie, the total score of the 2 items is  $\geq 3$ ), the patient will complete questions 3 through 9  
 1051 (unique questions) of the PHQ-9.

#### 1052 **6.4.1.5. Work Productivity and Activity Impairment Questionnaire: General Health V2.0**

1053 The generic version of the WPAI: General Health (GH) ([Appendix H](#)) questionnaire measures the  
 1054 overall effect of health on productivity at work and daily activities. The specific health problems  
 1055 version of the WPAI questionnaire allows investigators to attribute productivity and activity  
 1056 impairment issues to specific health conditions. This assessment will be done at baseline (visit 2)  
 1057 and the EOT visit (visit 5).

1058 The following scores (in percentages) will be derived based on the WPAI:GH questionnaire.

- 1059 • percent work item missed due to health:  $\frac{Q2}{Q2+Q4} \times 100$
- 1060 • percent impairment while working due to health:  $\frac{Q5}{10} \times 100$
- 1061 • percent overall work impairment due to health:  $\left\{ \frac{Q2}{Q2+Q4} + \left[ \left( 1 - \frac{Q2}{Q2+Q4} \right) \times \frac{Q5}{10} \right] \right\} \times 100$
- 1062 • percent activity impairment due to health:  $\frac{Q6}{10} \times 100$

#### 1063 **6.4.1.6. Patient's Global Impression of Change**

1064 The PGIC scale ([Appendix I](#)) is a validated generic tool for assessment of overall change in the  
 1065 severity of illness following treatment. Patients will rate how they feel now compared with how  
 1066 they felt before receiving study drug on a 7-point scale where 0 is "No change" and 7 is "A great  
 1067 deal better".

1068 Based on the PGIC assessment, a dichotomous scale of "Yes" or "No" will be derived. A favorable  
 1069 change is score of 5-7 = 'Yes', which means there is significant improvement with the treatment. If  
 1070 the response is 1-4 = 'No', it is considered no significant change.

### 1071 **6.4.2. Exploratory Efficacy Analysis**

#### 1072 **6.4.2.1. Electronic Headache Diary Data**

1073 Cochran Mantel-Haenszel test stratified by baseline preventive migraine medication use (yes/no)  
 1074 will be implemented for analyzing the responder type of exploratory efficacy endpoints. The SAS  
 1075 Proc FREQ will be used to carry out this analysis.

1076 An ANCOVA method defined in Section [6.2.2](#) and an MMRM model defined Section [6.2.3.1](#) will  
 1077 be implemented for the following exploratory endpoints analysis.

- 1078 • mean change from baseline (28-day run-in period) in the number of headache days of at  
 1079 least moderate severity during the 12-week period after the 1<sup>st</sup> dose of study drug
- 1080 • mean change from baseline (28-day run-in period) in the monthly average number of  
 1081 headache days of any severity during the 12-week period after the 1<sup>st</sup> dose of study drug

- 1082           • mean change from baseline (28-day run-in period) in the monthly average number of  
1083 headache hours of any severity during the 12-week period after the 1<sup>st</sup> dose of study  
1084 drug
- 1085           • mean change from baseline (28-day run-in period) in the monthly average number of  
1086 headache hours of at least moderate severity during the 12-week period after the 1<sup>st</sup> dose  
1087 of study drug
- 1088           • mean change from baseline (28-day run-in period) in the monthly average number of  
1089 days with nausea or vomiting during the 12-week period after the 1<sup>st</sup> dose of the study
- 1090           • mean change from baseline (28-day run-in period) in the monthly average number of  
1091 days with photophobia and phonophobia during the 12-week period after the 1<sup>st</sup> dose of  
1092 study drug

1093 Similar to the sensitivity analysis for the primary efficacy variable described in Section 6.2.3.1, an  
1094 MMRM model will be implemented to estimate the mean change from baseline for the following  
1095 endpoints by week after the 1<sup>st</sup> dose of study drug.

- 1096           • mean change from baseline in the weekly number of headache days of at least moderate  
1097 severity
- 1098           • mean change from baseline in the weekly number of migraine days

1099 LS means for the treatment groups, LS means and corresponding 95% confidence intervals for the  
1100 treatment differences (TEV-48125 - placebo), and associated p-values will be calculated by week.

1101 The LS means  $\pm$ SE of e-diary efficacy variables estimated by MMRM will be plotted by week for  
1102 each treatment group.

#### 1103 **6.4.2.2. Migraine-Specific Quality of Life**

1104 The transformed scores for the three domains (i.e., Role Function-Restrictive, Role Function-  
1105 Preventive and Emotional Function) of MSQOL will be derived for baseline (visit 2), visit 3, visit  
1106 4, and visit 5. The change from baseline values after the 3<sup>rd</sup> injection will be analyzed by ANCOVA  
1107 method as described in Section 6.2.2 and MMRM method as described in Section 6.2.3.1.

#### 1108 **6.4.2.3. EuroQol-5 Dimension Questionnaire**

1109 The number and percentage of patients rating their scale of 1 to 5 for the 5 domains will be  
1110 presented before and after treatment. The change from baseline values on the visual analogue scale  
1111 will be analyzed using the same ANCOVA method as described in Section 6.2.2.

#### 1112 **6.4.2.4. Patient Health Questionnaire**

1113 The change from baseline in total PHQ-9 score will be analyzed using the same ANCOVA method  
1114 as described in Section 6.2.2.

#### 1115 **6.4.2.5. Work Productivity and Activity Impairment Questionnaire : General Health V2.0**

1116 For the patients who are currently employed, their scores of

- 1117           • percent work item missed due to health

1118           • percent impairment while working due to health

1119           • percent overall work impairment due to health

1120           • percent activity impairment due to health

1121 will be analyzed using the same ANCOVA method as described in Section 6.2.2 .

#### 1122 **6.4.2.6. Patient’s Global Impression of Change Scale**

1123 The percentage of patients’ dichotomous scale of “ Yes” or “No” rated by PGIC assessments at 4-  
1124 week after each dose will be analyzed by Cochran Mantel-Haenszel test stratified by baseline  
1125 preventive migraine medication use (yes/no) as described in Section 6.3.2.

### 1126 **6.5. Subgroup Analysis**

1127 The primary analysis with ANCOVA method defined in Section 6.2.2 and MMRM method defined  
1128 in Section 6.2.3.1 will also be applied to the following subgroups for the change from baseline  
1129 values in the number of migraine days and the monthly average number of headache days of at least  
1130 moderate severity.

1131           • patients receiving or not receiving any concomitant preventive treatment at baseline

1132           • patients who used topiramate for migraine in the past

1133           • patients who used onabotulinumtoxinA for migraine in the past

1134           • patients in different age groups (18-45, >45 years old)

1135           • patients in different race groups (caucasian, non-caucasian)

1136           • patients by sex

## 1137 7. SAFETY ANALYSIS

### 1138 7.1. General

1139 The safety population will be used for all safety analyses. Summaries will be presented by treatment  
1140 group and all TV48125 as actually received unless specified otherwise.

### 1141 7.2. Study Drug Administration

1142 Following the baseline assessments, eligible patients will be randomly assigned with stratification  
1143 based on sex, country, and baseline use of preventive migraine medication (yes, no) to receive  
1144 monthly TEV-48125 at 225 mg, TEV-48125 at 675 mg followed by monthly placebo, or monthly  
1145 placebo.

1146 Study drug will be administered by qualified study personnel as sc injections approximately every  
1147 28 days for a total of 3 doses, as follows:

- 1148 • Patients randomized to receive monthly TEV-48125 225 mg will receive 1 active and 2  
1149 placebo injections at visit 2 and 1 active injection (225 mg/1.5 mL) at visits 3 and 4.
- 1150 • Patients randomized to receive TEV-48125 675 mg/placebo/placebo will receive  
1151 3 active injections (225 mg/1.5 mL) at visit 2 and 1 placebo injection at visits 3 and 4.
- 1152 • Patients randomized to receive placebo will receive 3 placebo injections at visit 2 and 1  
1153 single placebo injection at visits 3 and 4.

1154 Duration of treatment (days treated) is the number of days on treatment based on the 1<sup>st</sup> study drug  
1155 administration day and end of treatment (EOT) visit day/early withdrawal day (EOT visit day – first  
1156 day of study drug + 1). For subjects who are lost to follow-up, the EOT date is defined as the last  
1157 study drug administration date +27.

1158 Number (%) of patient receiving 1 dose, 2 doses, and 3 doses will be summarized using descriptive  
1159 statistics by treatment group. Duration of treatment (days) will also be summarized using  
1160 descriptive statistics for each treatment group.

### 1161 7.3. Adverse Events

1162 All adverse events will be coded using the MedDRA version 18.1.

1163 For adverse event recording, the study period is defined for each patient as the time period from  
1164 signature of the informed consent form through completion of visit 5 or the early withdrawal visit  
1165 for patients who withdraw from the study for any reason.

1166 Adverse events will be collected at each visit via adverse event inquiry.

1167 The following are considered protocol-defined adverse events of special interest to be sent to the  
1168 sponsor's Pharmacovigilance Department for evaluation: ophthalmic related adverse events of at  
1169 least moderate severity, events of possible drug-induced liver injury (AST or ALT  $\geq 3 \times$  the ULN,  
1170 total bilirubin  $\geq 2 \times$  the ULN or INR  $> 1.5$ ), or Hy's Law events, as well anaphylaxis and  
1171 hypersensitivity reactions. Hypersensitivity reactions will be monitored using the diagnostic criteria  
1172 for anaphylaxis as outlined by the 2006 Joint National Institute of Allergy and Infectious

1173 Disease/Food Allergy and Anaphylaxis Network Second Symposium on Anaphylaxis ([Sampson et](#)  
1174 [al, 2006](#)). In the event of suspected anaphylaxis, vital signs, including oxygen saturation and  
1175 respiration rate, will be measured.

1176 Summaries by treatment group will be presented for treatment emergent adverse events (overall and  
1177 by severity), treatment emergent adverse events determined by the investigator to be treatment-  
1178 related adverse events (overall and by severity), serious adverse events, adverse events causing  
1179 discontinuation from the study, non-serious treatment emergent adverse events and prior to  
1180 treatment adverse events. Additionally, the injection site reactions recorded as adverse events and  
1181 protocol defined adverse events will be summarized by treatment group separately.

1182 The incidence of adverse event will be summarized using descriptive statistics by SOC, PT, and  
1183 severity of the adverse event. Each patient will be counted only once within a SOC or a PT by using  
1184 the adverse events with the highest severity within each category. Treatment-related adverse event  
1185 summaries will include adverse events related to study drug and adverse events with missing  
1186 relationship to study drug. Adverse events with the missing flag indicating serious will be excluded  
1187 from the summary of serious adverse events but included in the summary of non-serious adverse  
1188 events.

1189 Listings for deaths, serious adverse events, adverse events leading to discontinuation, injection site  
1190 related adverse event, and protocol defined adverse events will be presented. All information  
1191 pertaining to adverse events noted during the study will be listed by subject, detailing verbatim  
1192 given by the investigator, PT, SOC, date of onset, date of resolution, severity, and relationship to  
1193 treatment. The onset of adverse events will also be shown relative (in number of days) to the 1<sup>st</sup> day  
1194 of treatment. In addition, MedDRA dictionary terms for adverse event descriptions, and adverse  
1195 event preferred terms by patient number and treatment group will be presented.

#### 1196 **7.4. Injection Site Assessments**

1197 Injection site assessments will be performed immediately and 1 hour after administration of each  
1198 dose of study drug ([Table 1](#)). The injection site(s) will be assessed for erythema, induration,  
1199 ecchymosis, and pain, and severity will be graded according to the following criteria:

- 1200 • Injection-site erythema, injection-site induration, and injection-site ecchymosis will be  
1201 graded according to measurements: absent, 5 mm to  $\leq 50$  mm (mild),  $>50$  to  $\leq 100$  mm  
1202 (moderate), and  $>100$  mm (severe).

1203 Injection-site pain will be measured as summarized in [Table 3](#).

1204 If a patient has severe injection site induration, erythema, and/or ecchymosis and/or grade 3  
1205 (severe) or grade 4 (worst possible) injection site pain at 1 hour after completion of study drug  
1206 administration, the patient will be reassessed at 3 hours after study drug administration and hourly  
1207 thereafter until the reaction/pain is of moderate or less severity.

1208 Number (%) of patients having injections and their post injection assessments for erythema,  
1209 induration, ecchymosis, and pain of each grade will be summarized by visits and timepoints for  
1210 each treatment group.

1211

1212 **Table 3: Severity of Pain Scale for Injection Site Assessments**

| Grade | Assessments    |
|-------|----------------|
| 0     | No pain        |
| 1     | Mild           |
| 2     | Moderate       |
| 3     | Severe         |
| 4     | Worst possible |

1213 To differentiate between assessments at active treatment (TEV 48125) injection sites and placebo  
1214 injection sites for subjects who receive 225 mg TEV 48125 (1 active, 2 placebo injections) at visit  
1215 2, summaries for these treatments will be presented by treatment type (TEV-48125 or placebo).  
1216 Subjects are only counted once for each treatment type, and if multiple sites with the same  
1217 treatment type (TEV-48125 or placebo) present with different severities, the most severe reaction  
1218 will be summarized.

### 1219 **7.5. Deaths**

1220 If any patient dies during the study all relevant information will be discussed in the patient's  
1221 narratives included in CSR.

1222

1223 **7.6. Clinical Laboratory Tests**

1224 Clinical laboratory tests (serum chemistry, hematology, coagulation, and urinalysis) will be  
 1225 performed at the time points detailed in [Table 1](#) using the central laboratory. Specific laboratory  
 1226 tests to be performed are listed below in [Table 4](#).

1227 **Table 4: Clinical Laboratory Test**

| Serum Chemistry                                                                                                                                                                                                                                                                                                                                                                                                                                                                                       | Hematology                                                                                                                                                                                                                                                                                                                                                                                                                                                                                                                                                                                                                    | Coagulation                                                                                                                | Urinalysis                                                                                                                                                                                                                                                                                                                                                                                                                                                                                      |
|-------------------------------------------------------------------------------------------------------------------------------------------------------------------------------------------------------------------------------------------------------------------------------------------------------------------------------------------------------------------------------------------------------------------------------------------------------------------------------------------------------|-------------------------------------------------------------------------------------------------------------------------------------------------------------------------------------------------------------------------------------------------------------------------------------------------------------------------------------------------------------------------------------------------------------------------------------------------------------------------------------------------------------------------------------------------------------------------------------------------------------------------------|----------------------------------------------------------------------------------------------------------------------------|-------------------------------------------------------------------------------------------------------------------------------------------------------------------------------------------------------------------------------------------------------------------------------------------------------------------------------------------------------------------------------------------------------------------------------------------------------------------------------------------------|
| <ul style="list-style-type: none"> <li>• calcium</li> <li>• phosphorus</li> <li>• sodium</li> <li>• potassium</li> <li>• chloride</li> <li>• carbon dioxide</li> <li>• magnesium</li> <li>• glucose</li> <li>• blood urea nitrogen</li> <li>• creatinine</li> <li>• ALT</li> <li>• AST</li> <li>• total bilirubin</li> <li>• direct bilirubin</li> <li>• lactate dehydrogenase</li> <li>• GGT</li> <li>• ALP</li> <li>• albumin</li> <li>• creatine phosphokinase</li> <li>• total protein</li> </ul> | <ul style="list-style-type: none"> <li>• hemoglobin</li> <li>• hematocrit</li> <li>• RBC count</li> <li>• RBC indices                             <ul style="list-style-type: none"> <li>- mean corpuscular volume</li> <li>- mean corpuscular hemoglobin concentration</li> <li>- RBC distribution width</li> </ul> </li> <li>• platelet count</li> <li>• WBC count and differential count (absolute values and percentages)                             <ul style="list-style-type: none"> <li>- neutrophils</li> <li>- lymphocytes</li> <li>- eosinophils</li> <li>- monocytes</li> <li>- basophils</li> </ul> </li> </ul> | <ul style="list-style-type: none"> <li>• prothrombin time</li> <li>• partial thromboplastin time</li> <li>• INR</li> </ul> | <ul style="list-style-type: none"> <li>• color and appearance</li> <li>• specific gravity</li> <li>• pH</li> <li>• blood (hemoglobin)</li> <li>• glucose</li> <li>• albumin</li> <li>• protein</li> <li>• ketones</li> <li>• leukocyte esterase</li> <li>• nitrite</li> <li>• direct bilirubin</li> <li>• microscopic                             <ul style="list-style-type: none"> <li>- bacteria</li> <li>- RBCs</li> <li>- WBCs</li> <li>- casts</li> <li>- crystals</li> </ul> </li> </ul> |

1228 ALP=alkaline phosphatase; ALT=alanine aminotransferase; AST=aspartate aminotransferase; GGT=gamma- glutamyl  
 1229 transpeptidase; INR=international normalized ratio; RBC=red blood cell; WBC=white blood cell.

1230 Laboratory tests results and changes from baseline for chemistry, hematology, urinalysis, and  
 1231 coagulation laboratory tests will be summarized by visits for each treatment group using descriptive  
 1232 statistics. Shifts (below, within, and above the normal range) from baseline to each visit and  
 1233 endpoint will be summarized using patient counts. Listings of all individual patients’ laboratory test  
 1234 results will be presented.

1235 The incidence of potentially clinically significant abnormal results will be summarized using  
 1236 descriptive statistics with the criteria specified in [Table 5](#). The potentially clinically significant  
 1237 abnormal laboratory values will include all postbaseline values (including scheduled, unscheduled,  
 1238 and early termination visits) for the summaries. Listings of patients who have potentially clinically  
 1239 significant abnormal laboratory data will be presented.



1240 **Table 5: Criteria for Potentially Clinically Significant Laboratory Values**

| Test                   | Criterion value                                       |
|------------------------|-------------------------------------------------------|
| <b>Serum chemistry</b> |                                                       |
| ALT                    | ≥3x ULN                                               |
| AST                    | ≥3x ULN                                               |
| ALP                    | ≥3x ULN                                               |
| GGT                    | ≥3x ULN                                               |
| LDH                    | ≥3x ULN                                               |
| BUN                    | ≥10.71 mmol/L                                         |
| Creatinine             | ≥177 μmol/L                                           |
| Uric acid      Men     | ≥625 μmol/L                                           |
| Women                  | ≥506 μmol/L                                           |
| Bilirubin (total)      | ≥34.2 μmol/L                                          |
| <b>Hematology</b>      |                                                       |
| Hematocrit      Men    | <0.37 L/L                                             |
| Women                  | <0.32 L/L                                             |
| Hemoglobin      Men    | ≤115 g/L                                              |
| Women                  | ≤95 g/L                                               |
| WBC counts             | ≤3 x 10 <sup>9</sup> /L<br>≥20 x 10 <sup>9</sup> /L   |
| Eosinophils            | ≥10%                                                  |
| ANC                    | ≤1 x 10 <sup>9</sup> /L                               |
| Platelet counts        | ≤75 x 10 <sup>9</sup> /L<br>≥700 x 10 <sup>9</sup> /L |
| <b>Urinalysis</b>      |                                                       |
| HGB                    | ≥2 unit increase from baseline                        |
| Glucose                | ≥2 unit increase from baseline                        |
| Ketones                | ≥2 unit increase from baseline                        |
| Total protein          | ≥2 unit increase from baseline                        |

1241 ULN=upper limit of normal range.

1242 ALP=alkaline phosphatase; ALT=alanine aminotransferase; ANC=absolute neutrophil count AST=aspartate

1243 aminotransferase; BUN=blood urea nitrogen; GGT=gamma- glutamyl transpeptidase; HGB=hemoglobin;

1244 INR=international normalized ratio; LDH=lactate dehydrogenase; RBC=red blood cell; ULN=upper limit of normal

1245 range; WBC=white blood cell

1246 Serum  $\beta$ -HCG tests will be performed for all women of childbearing potential at screening (visit 1),  
 1247 and urine  $\beta$ -HCG tests will be performed for women of childbearing potential at visits 2 through 5.  
 1248 Positive pregnancy test results will be listed.

## 1249 **7.7. Vital Signs**

1250 Vital signs (pulse, systolic and diastolic blood pressure, body temperature, and respiratory rate) will  
 1251 be measured before other assessments (eg, blood draws and administration of questionnaires) at the  
 1252 time points detailed in [Table 1](#).

1253 For any abnormal vital sign finding, the measurement should be repeated as soon as possible. Any  
 1254 vital sign value that is judged by the investigator as a clinically significant change (worsening) from  
 1255 a baseline value will be considered an adverse event.

1256 Vital signs values and changes from baseline to each visit and endpoint will be summarized using  
 1257 descriptive statistics. The incidence of potentially clinically significant abnormal values will be  
 1258 summarized for selected vital signs using descriptive statistics.

1259 [Table 6](#) specifies the criteria for identifying vital signs as potentially clinically significant abnormal.  
 1260 Note that in order to be identified as potentially clinically significant abnormal, a value would need  
 1261 to meet both conditions below: i.e., have a value beyond the criterion value and a change of at least  
 1262 the magnitude specified in the change from baseline column. The potentially clinically significant  
 1263 abnormal vital signs values will include all postbaseline values (including scheduled, unscheduled,  
 1264 and early termination visits) for the summaries.

1265 **Table 6: Criteria for Potentially Clinically Significant Vital Signs**

| Vital Sign               | Criterion value           | Change relative to baseline        |
|--------------------------|---------------------------|------------------------------------|
| Pulse                    | $\geq 120$ bpm            | Increase of $\geq 15$              |
|                          | $\leq 50$ bpm             | Decrease of $\geq 15$              |
| Systolic blood pressure  | $\geq 180$ mm Hg          | Increase of $\geq 20$              |
|                          | $\leq 90$ mm Hg           | Decrease of $\geq 20$              |
| Diastolic blood pressure | $\geq 105$ mm Hg          | Increase of $\geq 15$              |
|                          | $\leq 50$ mm Hg           | Decrease of $\geq 15$              |
| Respiratory rate         | $< 10$ breaths/min        |                                    |
| Body temperature         | $\geq 38.3^\circ\text{C}$ | Change of $\geq 1.1^\circ\text{C}$ |

1266 bpm=beats per minute

1267 A listing for potentially clinically significant abnormal vital signs will be presented.

## 1268 **7.8. Electrocardiography**

1269 Twelve-lead ECGs will be conducted before other assessments (eg, blood draws and administration  
 1270 of questionnaires) at the time points detailed in [Table 1](#).

1271 The ECGs will be performed in triplicate, with approximately 1 minute between recordings. The  
 1272 average of the recorded measurements will be calculated for each visit.

1273 Any ECG finding that is judged by the investigator as a potentially clinically significant change  
1274 (worsening) compared with the baseline value will be considered an adverse event.

1275 Shifts (normal and abnormal) from baseline to the endpoint will be summarized using patient  
1276 counts and percentages. ECG variables results and changes from baseline to EOT/EOS will be  
1277 summarized using descriptive statistics.

## 1278 **7.9. Physical Examinations**

1279 Physical examinations, including height (to be obtained at the screening visit only) and weight will  
1280 be performed at the time points detailed in [Table 1](#).

1281 A complete physical examination will include the following organ systems: general appearance;  
1282 head, eyes, ears, nose, and throat; chest and lungs; heart; abdomen; musculoskeletal; skin; lymph  
1283 nodes; and neurological. Any physical examination finding that is judged by the investigator as a  
1284 potentially clinically significant change (worsening) compared with a baseline value will be  
1285 considered an adverse event.

1286 Abnormal physical examination findings will be listed.

## 1287 **7.10. Electronic Columbia-Suicide Severity Rating Scale**

1288 The electronic columbia-suicide severity rating scale (eC-SSRS) will be used to assess the patient's  
1289 suicidal ideation (severity and intensity) and behavior ([Posner et al 2011](#)). The eC-SSRS  
1290 'Baseline/Screening version' will be completed by the patient at visit 2, and the eC-SSRS 'Since  
1291 Last Visit version' will be completed by the patient at all other time points, as described in [Table 1](#).

1292 Any positive findings on the eC-SSRS 'Since Last Visit version' require evaluation by a physician  
1293 or doctoral-level psychologist.

1294 Patients having positive findings will be listed.

## 1295 **7.11. Concomitant Therapy or Medication**

1296 All concomitant medications will be coded using the WHO dictionary of medical codes. The  
1297 concomitant medication will include all medications taken after the 1<sup>st</sup> study drug administration.

1298 The incidence of concomitant medications will be summarized using descriptive statistics by  
1299 therapeutic class and preferred term. Patients are counted only once in each therapeutic class  
1300 category, and only once in each preferred term category.

1301 The subset of concomitant pain medication and medication or therapy for migraine/headache will  
1302 be summarized by the following indication categories.

- 1303 • migraine/headache preventive medication
- 1304 • opioids for reasons other than migraine/headache
- 1305 • opioids for migraine/headache
- 1306 • triptans and ergots
- 1307 • NSAIDs for reasons other than migraine/headache
- 1308 • NSAIDs for migraine/headache
- 1309 • other

1310 **8. PHARMACOKINETIC ANALYSIS**

1311 There are no prespecified pharmacokinetic endpoints.

1312 Summary of plasma concentration of the study drug will be based on the safety population and will  
1313 be presented by visit for each of the active treatment groups (samples from patients who received  
1314 placebo will not be analyzed). The plasma concentration will be listed by active treatments,  
1315 scheduled visits and timepoints.

1316 **9. BIOMARKER ANALYSIS**

1317 The biomarker analysis is not included in this SAP. A separate planned analysis will be conducted.

1318 **10. STATISTICAL SOFTWARE**

1319 All data listings, summaries, and statistical analyses will be generated using SAS<sup>®</sup>.

1320 **11. CHANGES TO PROTOCOL SPECIFIED ANALYSES**

1321 The FAS definition is modified per the FDA feedback. The original definition was “all patients in  
1322 the ITT population who receive at least 1 dose of study drug and have at least **1** post baseline  
1323 efficacy assessment on the primary endpoint”. The modified definition is “all patients in the ITT  
1324 population who receive at least 1 dose of study drug and have at least **10** days of post baseline  
1325 efficacy assessments on the primary endpoint”.

1326 The first 4-week efficacy data for at least moderate severity headache days and migraine days will  
1327 be explored by week using descriptive method and MMRM method.

1328 **12. REFERENCES**

- 1329 Classification Committee of the International Headache Society. The International Classification of  
1330 Headache Disorders, 3<sup>rd</sup> edition (beta version). *Cephalalgia* 2013;33(9):629-808.
- 1331 Kroenke K, Spitzer RL, Williams JB, Löwe B. The Patient Health Questionnaire somatic, anxiety,  
1332 and depressive symptom scales: a systematic review. *Gen Hosp Psychiatry* 2010;32(4):345-59.
- 1333 Posner K, Brown GK, Stanley B, Brent DA, Yershova KV, Oquendo MA, et al. The Columbia  
1334 Suicide Severity Rating Scale: initial validity and internal consistency findings from three multisite  
1335 studies with adolescents and adults. *Am J Psychiatry* 2011;168(12):1266-77.
- 1336 Sampson HA, Munoz-Furlong A, Campbell RL, Adkinson NF, Jr., Bock SA, Branum A, et al.  
1337 Second symposium on the definition and management of anaphylaxis: summary report-Second  
1338 National Institute of Allergy and Infectious Disease/Food Allergy and Anaphylaxis Network  
1339 symposium.[reprint in *Ann Emerg Med*. 2006 Apr;47(4):373-80; PMID:16546624]. *Journal of*  
1340 *Allergy & Clinical Immunology*. 2006 Feb;117(2):391-7.
- 1341 Silberstein S, Holland S, Freitag F, Dodick DW, Argoff C, Ashma E. Evidence-based guideline  
1342 update: pharmacologic treatment of episodic migraine prevention in adults. *Neurology*  
1343 2012;78:1337-45.
- 1344 Spitzer RL, Kroenke K, Williams JB. Validation and utility of self-report version of PRIME MD:  
1345 the PHQ primary care study. Primary care evaluation of mental disorders. Patient health  
1346 questionnaire. *JAMA* 1999;282(18):1737-44.

1347 **APPENDIX A. E-DIARY QUESTIONNAIRE**

| <b>The following questions are referring to yesterday (00:00 - 23:59)</b> |                                                                                            |
|---------------------------------------------------------------------------|--------------------------------------------------------------------------------------------|
| <b>A1</b>                                                                 | Did you experience a headache of any severity yesterday?                                   |
| <b>A2</b>                                                                 | Did you have at least four (4) consecutive hours of headache yesterday?                    |
| <b>A3</b>                                                                 | Did you have at least two (2) consecutive hours of headache yesterday?                     |
| <b>A4</b>                                                                 | What was the greatest severity that your headache reached yesterday at anytime?            |
| <b>A5</b>                                                                 | How many total hours did you have a headache(s) of any severity yesterday?                 |
| <b>A6</b>                                                                 | How many total hours did you have a headache(s) of moderate or severe intensity yesterday? |

1348

| <b>The following questions are referring to yesterday (00:00 - 23:59) AT THE TIME WHEN YOUR HEADCAHE REACHED THE WORST SEVERITY</b> |                                                                                                                                                                                                                        |
|-------------------------------------------------------------------------------------------------------------------------------------|------------------------------------------------------------------------------------------------------------------------------------------------------------------------------------------------------------------------|
| <b>B1</b>                                                                                                                           | Was it worse on one side of the head than on the other, and/or limited to one side of the head?                                                                                                                        |
| <b>B2</b>                                                                                                                           | Was it pounding, pulsating, or throbbing?                                                                                                                                                                              |
| <b>B3</b>                                                                                                                           | Was it made worse by routine activities such as walking or climbing stairs?                                                                                                                                            |
| <b>B4</b>                                                                                                                           | Did you have nausea, or get sick to your stomach?                                                                                                                                                                      |
| <b>B5</b>                                                                                                                           | Did light bother you more than when you didn't have a headache (did you experience photophobia)?                                                                                                                       |
| <b>B6</b>                                                                                                                           | Did sounds bother you more than when you didn't have a headache (did you experience phonophobia)?                                                                                                                      |
| <b>The following questions are referring to yesterday (00:00 - 23:59)</b>                                                           |                                                                                                                                                                                                                        |
| <b>B7</b>                                                                                                                           | Did you experience something like seeing spots, stars, lines, flashing lights, zigzag lines, or "heat waves" around the time of your headache? (This is different from "light bothers you")                            |
| <b>B8</b>                                                                                                                           | Did you have feelings such as numbness or tingling in any part of your body or face around the time of your headache?                                                                                                  |
| <b>B9</b>                                                                                                                           | Did you experience something like seeing spots, stars, lines, flashing lights, zigzag lines, or "heat waves" similar to those you may have seen when you have a headache? (This is different from "light bothers you") |
| <b>B10</b>                                                                                                                          | Did you have feelings such as numbness or tingling in any part of your body or face, similar to what you may have felt when you have a headache?                                                                       |

1349



|           |                                                                                                                                       |
|-----------|---------------------------------------------------------------------------------------------------------------------------------------|
| <b>C0</b> | Did you take any medications yesterday for your headache/migraine?                                                                    |
| <b>C1</b> | Were any of the following Medications taken yesterday?                                                                                |
|           | Local list of Triptans, Ergots and Opioid combinations, Presented in groups of 5 per screen, with Yes / No option to answer.          |
|           | <b>For the following questions please do not consider any medications you listed in the above questions.</b>                          |
| <b>D1</b> | Did you use any other prescription medications (i.e. opioids) in an effort to get relief from your headache/migraine?                 |
| <b>D5</b> | Did you use any other over the counter medications in an effort to get relief from your headache/migraine?                            |
| <b>E1</b> | Did you have problems falling sleep last night?                                                                                       |
| <b>E2</b> | Which of the following situations best describe your work/school performance yesterday, when you did not have a headache?             |
| <b>E3</b> | What would better describe in general, how did you feel yesterday?                                                                    |
| <b>E4</b> | How much of the time yesterday did you find it difficult to concentrate on what you needed to do?                                     |
| <b>E5</b> | On average, how much of the time yesterday were you very tired, asleep, or feeling drained?                                           |
| <b>E6</b> | Which of the following situations best describe your ability to perform household chores yesterday, when you did not have a headache? |
| <b>E7</b> | How engaged were you with your partner's or children's activities yesterday, when you didn't have a headache?                         |
| <b>E8</b> | Overall, how interested were you in doing daily activities yesterday?                                                                 |

1351 **APPENDIX B. LOGICS FOR ENDPOINTS DERIVATION**

| <b>EM migraine day: 1 of the following 5 options</b> |            |                             |       |
|------------------------------------------------------|------------|-----------------------------|-------|
| <b>OPTION 1</b>                                      |            |                             |       |
| <b>Part 1</b>                                        | 1          | A1                          | YES   |
|                                                      | 2*         | A2 or A3                    | YES   |
| <b>AND</b>                                           |            |                             |       |
| <b>TWO OF THE FOLLOWING</b>                          |            |                             |       |
| <b>Part 2</b>                                        | 1          | A4                          | Mod-S |
|                                                      | 2          | B1                          | YES   |
|                                                      | 3          | B2                          | YES   |
|                                                      | 4          | B3                          | YES   |
| <b>AND</b>                                           |            |                             |       |
| <b>ONE OF THE FOLLOWING</b>                          |            |                             |       |
| <b>Part 3</b>                                        | 1          | B4                          | YES   |
|                                                      |            |                             |       |
|                                                      | 2          | B5                          | YES   |
|                                                      | <b>AND</b> |                             |       |
|                                                      |            | B6                          | YES   |
| <b>OPTION 2</b>                                      |            |                             |       |
| 1                                                    | A1         | YES                         |       |
| 2                                                    | C0         | YES                         |       |
| 3                                                    | C1         | YES                         |       |
| 4                                                    | C1         | ERGOT OR TRIPTAN            |       |
| <b>OPTION 3</b>                                      |            |                             |       |
| 1                                                    | A1         | YES                         |       |
| 2                                                    | C0         | YES                         |       |
| 3                                                    | D1         | YES                         |       |
| 4                                                    | D1         | ERGOT OR TRIPTAN            |       |
| <b>OPTION 4</b>                                      |            |                             |       |
| 1                                                    | A1         | YES                         |       |
| <b>AND</b>                                           |            | <b>ONE OF THE FOLLOWING</b> |       |
| 1                                                    | B7         | YES                         |       |
| 2                                                    | B8         | YES                         |       |

\* For eligibility evaluation, replace A2 or A3 = YES with A2='YES'.

1352  
1353

| <b>OPTION 5: PROBABLE MIGRAINE</b>                                                     |   |    |       |
|----------------------------------------------------------------------------------------|---|----|-------|
| If <b>Part 1</b> and <b>Part 2</b> met, <b>Part 3</b> needs ONLY one of the following: |   |    |       |
| <b>Part 3</b>                                                                          |   | B5 | YES   |
|                                                                                        |   | B6 | YES   |
| If <b>Part 1</b> and <b>Part 3</b> met, <b>Part 2</b> needs ONLY one of the following: |   |    |       |
| <b>Part 2</b>                                                                          | 1 | A4 | Mod-S |
|                                                                                        | 2 | B1 | YES   |
|                                                                                        | 3 | B2 | YES   |
|                                                                                        | 4 | B3 | YES   |
| If <b>Part 2</b> and <b>Part 3</b> met, <b>Part 1</b> needs ONLY the following:        |   |    |       |
| <b>Part 1</b>                                                                          | 1 | A1 | YES   |

1354

1355

1356 **APPENDIX C. THE MIGRAINE DISABILITY ASSESSMENT**

1357 The MIDAS (Migraine Disability Assessment) questionnaire was put together to help you measure  
 1358 the impact your headaches have on your life. The information on this questionnaire is also helpful  
 1359 for your primary care provider to determine the level of pain and disability caused by your  
 1360 headaches and to find the best treatment for you.

1361 **INSTRUCTIONS:**

1362  
 1363 Please answer the following questions about ALL of the headaches you have had over the last 3  
 1364 months. Select your answer in the box next to each question. Select zero if you did not have the  
 1365 activity in the last 3 months.  
 1366

\_\_\_\_\_ 1. On how many days in the last 3 months did you miss work or school because of your headaches?

\_\_\_\_\_ 2. How many days in the last 3 months was your productivity at work or school reduced by half or more because of your headaches? (Do not include days you counted in question 1 where you missed work or school.)

\_\_\_\_\_ 3. On how many days in the last 3 months did you not do household work (such as housework, home repairs and maintenance, shopping, caring for children and relatives) because of your headaches?

\_\_\_\_\_ 4. How many days in the last 3 months was your productivity in household work reduced by half or more because of your headaches? (Do not include days you counted in question 3 where you did not do household work.)

\_\_\_\_\_ 5. On how many days in the last 3 months did you miss family, social or leisure activities because of your headaches?

\_\_\_\_\_ Total (Questions 1-5)

\_\_\_\_\_ A. On how many days in the last 3 months did you have a headache? (If a headache lasted more than 1 day, count each day.)

\_\_\_\_\_ B. On a scale of 0 - 10, on average how painful were these headaches? (where 0 = no pain at all, and 10 = pain as bad as it can be.)

1367  
 1368  
 1369  
 1370  
 1371  
 1372  
 1373  
 1374  
 1375  
 1376  
 1377  
 1378  
 1379  
 1380  
 1381

**Scoring:** After you have filled out this questionnaire, add the total number of days from questions 1-5 (ignore A and B)

| MIDAS Grade | Definition              | MIDAS Score |
|-------------|-------------------------|-------------|
| I           | Little or no disability | 0-5         |
| II          | Mild disability         | 6-10        |
| III         | Moderate disability     | 11-20       |
| IV          | Severe disability       | 21+         |

**Please give the completed form to your clinician.**

This survey was developed by Richard B. Lipton, MD, Professor of Neurology, Albert Einstein College of Medicine, New York, NY, and Walter F. Stewart, MPH, PhD, Associate Professor of Epidemiology, Johns Hopkins University, Baltimore, MD.

1382 **APPENDIX D. MIGRAINE-SPECIFIC QUALITY OF LIFE**  
1383 **QUESTIONNAIRE (MSQ) (VERSION 2.1)**  
1384

1385 While answering the following questions, please think about *all migraine attacks* you may have had *in the*  
1386 *past 4 weeks*.

- 1387
- 1388 1. In the past 4 weeks, how often have migraines **interfered** with how well you dealt with family, friends  
1389 and others who are close to you? (Select only **one** response.)  
1390
- 1391  1 None of the time  
1392  2 A little bit of the time  
1393  3 Some of the time  
1394  4 A good bit of the time  
1395  5 Most of the time  
1396  6 All of the time  
1397
- 1398 2. In the past 4 weeks, how often have migraines **interfered** with your leisure time activities, such as  
1399 reading or exercising? (Select only **one** response.)  
1400
- 1401  1 None of the time  
1402  2 A little bit of the time  
1403  3 Some of the time  
1404  4 A good bit of the time  
1405  5 Most of the time  
1406  6 All of the time  
1407
- 1408 3. In the past 4 weeks, how often have you had **difficulty** in performing work or daily activities because  
1409 of migraine symptoms? (Select only **one** response.)  
1410
- 1411  1 None of the time  
1412  2 A little bit of the time  
1413  3 Some of the time  
1414  4 A good bit of the time  
1415  5 Most of the time  
1416  6 All of the time  
1417

- 1418 4. In the past 4 weeks, how often did migraines **keep you** from getting as much done at work or at home?  
1419 (Select only **one** response.)  
1420
- 1421 1  None of the time  
1422 2  A little bit of the time  
1423 3  Some of the time  
1424 4  A good bit of the time  
1425 5  Most of the time  
1426 6  All of the time  
1427
- 1428 5. In the past 4 weeks, how often did migraines **limit** your ability to concentrate on work or daily  
1429 activities? (Select only **one** response.)  
1430
- 1431 1  None of the time  
1432 2  A little bit of the time  
1433 3  Some of the time  
1434 4  A good bit of the time  
1435 5  Most of the time  
1436 6  All of the time  
1437
- 1438 6. In the past 4 weeks, how often have migraines **left you too tired** to do work or daily activities? (Select  
1439 only **one** response.)  
1440
- 1441 1  None of the time  
1442 2  A little bit of the time  
1443 3  Some of the time  
1444 4  A good bit of the time  
1445 5  Most of the time  
1446 6  All of the time  
1447

- 1448 7. In the past 4 weeks, how often have migraines **limited** the number of days you have felt energetic?  
1449 (Select only **one** response.)  
1450
- 1451  1 None of the time  
1452  2 A little bit of the time  
1453  3 Some of the time  
1454  4 A good bit of the time  
1455  5 Most of the time  
1456  6 All of the time  
1457
- 1458 8. In the past 4 weeks, how often have you had to **cancel** work or daily activities because you had a  
1459 migraine? (Select only **one** response.)  
1460
- 1461  1 None of the time  
1462  2 A little bit of the time  
1463  3 Some of the time  
1464  4 A good bit of the time  
1465  5 Most of the time  
1466  6 All of the time  
1467
- 1468 9. In the past 4 weeks, how often did you **need help** in handling routine tasks such as every day  
1469 household chores, doing necessary business, shopping, or caring for others, when you had a migraine?  
1470 (Select only **one** response.)  
1471
- 1472  1 None of the time  
1473  2 A little bit of the time  
1474  3 Some of the time  
1475  4 A good bit of the time  
1476  5 Most of the time  
1477  6 All of the time  
1478

- 1479 10. In the past 4 weeks, how often did you have to **stop** work or daily activities to deal with migraine  
1480 symptoms? (Select only **one** response.)  
1481
- 1482 1  None of the time  
1483 2  A little bit of the time  
1484 3  Some of the time  
1485 4  A good bit of the time  
1486 5  Most of the time  
1487 6  All of the time  
1488
- 1489 11. In the past 4 weeks, how often were you **not able to go** to social activities such as parties, dinner with  
1490 friends, because you had a migraine? (Select only **one** response.)  
1491
- 1492 1  None of the time  
1493 2  A little bit of the time  
1494 3  Some of the time  
1495 4  A good bit of the time  
1496 5  Most of the time  
1497 6  All of the time  
1498  
1499
- 1500 12. In the past 4 weeks, how often have you **felt** fed up or frustrated because of your migraines? (Select  
1501 only **one** response.)  
1502
- 1503 1  None of the time  
1504 2  A little bit of the time  
1505 3  Some of the time  
1506 4  A good bit of the time  
1507 5  Most of the time  
1508 6  All of the time  
1509  
1510

1511 13. In the past 4 weeks, how often have you **felt** like you were a burden on others because of your  
1512 migraines? (Select only **one** response.)

1513

1514  1 None of the time

1515  2 A little bit of the time

1516  3 Some of the time

1517  4 A good bit of the time

1518  5 Most of the time

1519  6 All of the time

1520

1521 14. In the past 4 weeks, how often have you been **afraid** of letting others down because of your  
1522 migraines? (Select only **one** response.)

1523

1524  1 None of the time

1525  2 A little bit of the time

1526  3 Some of the time

1527  4 A good bit of the time

1528  5 Most of the time

1529  6 All of the time

1530

1531



## 1532 **APPENDIX E. SCORING INSTRUCTIONS FOR MSQ (VERSION 2.1)**

1533 MSQ (Version 2.1) is a 14-item self-administered questionnaire. Patients are asked to provide  
1534 responses to each item using a standard six-point Likert type scale. The specific items which make  
1535 up each dimension are presented in Appendix D.

### 1536 **Scoring**

1537 Each of the three MSQ dimensions is scored independently. For each dimension, a higher score  
1538 indicates a better health status. The 14 MSQ items used in scoring are worded with a negative  
1539 perspective, therefore must be recoded before the dimension scores are calculated.

1540 The scoring of the MSQ is completed in 3 steps:

- 1541 1. Recoding of MSQ items (final item value assignment)
- 1542 2. Computation of raw dimension scores
- 1543 3. Transformation of raw dimension scores to a 0 to 100 scale

1544

### 1545 **Final item value assignment**

1546 The precoded and final item values for each MSQ item response is shown in Table 1. All item values range  
1547 from 1 to 6.

1548

### 1549 **How to handle missing values**

1550 In the event that responses on one or more items within a dimension are missing, a missing item value may  
1551 be estimated using the average of the other items within the same dimension.

1552

1553 The general rule of thumb for handling missing data similar to the SF-36 Health Survey is applied. If a  
1554 respondent answered at least half of the items in a multi-item scale (or half plus one in the case of scales with  
1555 an odd number of items), a missing item value can be estimated. Therefore, when the number of missing  
1556 items is fewer than or equal to 3 for the Role Function-Restrictive, fewer than or equal to 2 for the Role  
1557 Function-Preventive, and fewer than or equal to 1 for the Emotional Function dimension, the value of  
1558 missing item(s) can be estimated using the average of the other completed items within the same dimension.

1559

1560 For example, if a respondent leaves one item (e.g. item 4) within the 7-item Role Function-Restrictive  
1561 dimension blank, substitute the respondent's average score across the six completed Role Function-  
1562 Restrictive items (e.g. item 1, 2, 3, 5, 6, 7) for that one item.

1563

1564 It is important to note that the psychometric properties of the MSQ dimension are based on the assumption  
1565 that all items within the dimension are answered. Therefore, when the number of missing responses  
1566 exceeds the limits as noted above, a dimension score may not be estimated and should be considered as  
1567 missing.

1568

### 1569 **Raw score computation**

1570 Once a final item value has been assigned to each item, a raw score can be computed for each MSQ  
 1571 dimension. The raw score for each dimension is simply the algebraic sum of the final item value for all items  
 1572 in that dimension. The range of each raw dimension score is shown in Table 2.

1573  
 1574 **Transformation of dimension scores**

1575 After the raw score for each MSQ dimension is computed, the each score is transformed to a 0 to 100 scale.  
 1576 The transformation formula for each dimension is provided in Table 2. The transformation process allows  
 1577 each dimension score to reflect the percentage of the total possible score achieved (since 100 equal the  
 1578 highest score).

1579  
 1580 **Scoring checks**

1581 The following scoring checks are recommended to ensure accuracy in data entry and processing:

- 1582 1) After recoding items to their final item values, inspect the frequency distribution to verify  
 1583 all item values are within the range of 1 to 6.
- 1584 2) Inspect frequency distributions for raw scores and transformed scores to verify that all  
 1585 scores are within the expected ranges.

1586

1587 **Table 1 Precoded and final item values for MSQ item responses**

| Item No. | Response categories      | Precoded items value | Final item value |
|----------|--------------------------|----------------------|------------------|
| 1-14     | None of the time         | 1                    | 6                |
|          | A little bit of the time | 2                    | 5                |
|          | Some of the time         | 3                    | 4                |
|          | A good bit of the time   | 4                    | 3                |
|          | Most of the time         | 5                    | 2                |
|          | All of the time          | 6                    | 1                |

1588

1589 **Table 2 Raw score and transformation formula for each MSQ dimension**

| MSQ dimension               | Item No. | Raw score range | Transformation formula                   |
|-----------------------------|----------|-----------------|------------------------------------------|
| Role Function - Restrictive | 1-7      | 7 to 42         | $\frac{(raw\ score - 7) \times 100}{35}$ |
| Role Function - Preventive  | 8-11     | 4 to 24         | $\frac{(raw\ score - 4) \times 100}{20}$ |
| Emotional Function          | 12-14    | 3 to 18         | $\frac{(raw\ score - 3) \times 100}{15}$ |

1590

1591 **APPENDIX F. EQ-5D-5L AND EQ VAS**

1592 Under each heading, please tick the ONE box that best describes your health TODAY

**Mobility**

- I have no problems in walking about
- I have slight problems in walking about
- I have moderate problems in walking about
- I have severe problems in walking about
- I am unable to walk about

**Self-Care**

- I have no problems washing or dressing myself
- I have slight problems washing or dressing myself
- I have moderate problems washing or dressing myself
- I have severe problems washing or dressing myself
- I am unable to wash or dress myself

**Usual Activities** (*e.g. work, study, housework, family or leisure activities*)

- I have no problems doing my usual activities
- I have slight problems doing my usual activities
- I have moderate problems doing my usual activities
- I have severe problems doing my usual activities
- I am unable to do my usual activities

**Pain/Discomfort**

- I have no pain or discomfort
- I have slight pain or discomfort
- I have moderate pain or discomfort
- I have severe pain or discomfort
- I have extreme pain or discomfort

**Anxiety/Depression**

- I am not anxious or depressed
- I am slightly anxious or depressed
- I am moderately anxious or depressed
- I am severely anxious or depressed
- I am extremely anxious or depressed

- We would like to know how good or bad your health is **TODAY**.
- This scale is numbered from 0 to 100.
- 100 means the best health you can imagine.  
0 means the worst health you can imagine.
- Mark an **X** on the scale to indicate how your health is **TODAY**.
- Now, please write the number you marked on the scale in the box below.

YOUR HEALTH TODAY =

SAMPLE

The best health  
you can imagine

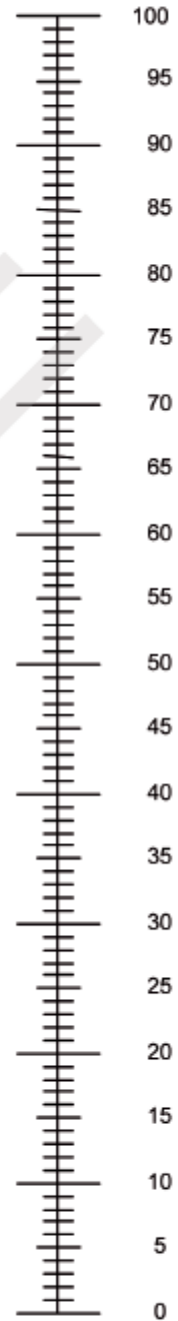

The worst health  
you can imagine

1595 **APPENDIX G. PATIENT HEALTH QUESTIONNAIRE (PHQ-2) AND (PHQ-**  
1596 **9)**

1597

1598 Screening for Depression

1599

|                                                                                                                                                                                                                                                 |
|-------------------------------------------------------------------------------------------------------------------------------------------------------------------------------------------------------------------------------------------------|
| Quick Screen                                                                                                                                                                                                                                    |
| A quick way of screening patients for depression is to ask patients to respond the first two questions of PHQ-9:                                                                                                                                |
| Over the last 2 weeks, how often have you been bothered by any of the following problems?<br>Give answers as 0 to 3, using this scale:<br>0=Not at all; 1=Several days; 2=More than half the days; 3=Nearly every day                           |
| <b><i>1. Little interest or pleasure in doing things?</i></b><br><b><i>2. Feeling down, depressed or hopeless?</i></b>                                                                                                                          |
| If the total score of the patient's response to <u>both</u> questions is <3, the screen is negative.<br>If the total score is $\geq 3$ , PHQ-2 is positive and the patient will complete questions 3 through 9 (unique questions) of the PHQ-9. |

1600

1601

1602

## PATIENT HEALTH QUESTIONNAIRE-9 (PHQ-9)

**Over the last 2 weeks, how often have you been bothered by any of the following problems?**

*(Use “✓” to indicate your answer)*

|                                                                                                                                                                             | Not at all | Several days | More than half the days | Nearly every day |
|-----------------------------------------------------------------------------------------------------------------------------------------------------------------------------|------------|--------------|-------------------------|------------------|
| 1. Little interest or pleasure in doing things                                                                                                                              | 0          | 1            | 2                       | 3                |
| 2. Feeling down, depressed, or hopeless                                                                                                                                     | 0          | 1            | 2                       | 3                |
| 3. Trouble falling or staying asleep, or sleeping too much                                                                                                                  | 0          | 1            | 2                       | 3                |
| 4. Feeling tired or having little energy                                                                                                                                    | 0          | 1            | 2                       | 3                |
| 5. Poor appetite or overeating                                                                                                                                              | 0          | 1            | 2                       | 3                |
| 6. Feeling bad about yourself — or that you are a failure or have let yourself or your family down                                                                          | 0          | 1            | 2                       | 3                |
| 7. Trouble concentrating on things, such as reading the newspaper or watching television                                                                                    | 0          | 1            | 2                       | 3                |
| 8. Moving or speaking so slowly that other people could have noticed? Or the opposite — being so fidgety or restless that you have been moving around a lot more than usual | 0          | 1            | 2                       | 3                |
| 9. Thoughts that you would be better off dead or of hurting yourself in some way                                                                                            | 0          | 1            | 2                       | 3                |

**FOR OFFICE CODING**

\_\_\_\_\_ + \_\_\_\_\_ + \_\_\_\_\_ + \_\_\_\_\_  
 =Total Score: \_\_\_\_\_

**If you checked off any problems, how difficult have these problems made it for you to do your work, take care of things at home, or get along with other people?**

**Not difficult at all**

**Somewhat difficult**

**Very difficult**

**Extremely difficult**

1603

1604 **APPENDIX H. WORK PRODUCTIVITY AND ACTIVITY IMPAIRMENT**  
1605 **QUESTIONNAIRE: GENERAL HEALTH V2.0 (WPAI:GH)**  
1606

1607 The following questions ask about the effect of your health problems on your ability to work and perform  
1608 regular activities. By health problems we mean any physical or emotional problem or symptom. *Please fill in*  
1609 *the blanks or circle a number, as indicated.*

1610

1611 1. Are you currently employed (working for pay)? \_\_\_\_\_ NO \_\_\_\_\_ YES

1612 *If NO, check "NO" and skip to question 6.*

1613 The next questions are about the **past seven days**, not including today.

1614

1615 2. During the past seven days, how many hours did you miss from work because of your health  
1616 problems? *Include hours you missed on sick days, times you went in late, left early, etc., because of*  
1617 *your health problems. Do not include time you missed to participate in this study.*

1618 \_\_\_\_\_HOURS

1619

1620 3. During the past seven days, how many hours did you miss from work because of any other reason,  
1621 such as vacation, holidays, time off to participate in this study?

1622 \_\_\_\_\_HOURS

1623

1624 4. During the past seven days, how many hours did you actually work?

1625 \_\_\_\_\_HOURS *(If "0", skip to question 6.)*

1626

1627 5. During the past seven days, how much did your health problems affect your productivity while you  
1628 were working?  
1629

1630 *Think about days you were limited in the amount or kind of work you could do, days you accomplished*  
1631 *less than you would like, or days you could not do your work as carefully as usual. If health problems*  
1632 *affected your work only a little, choose a low number. Choose a high number if health problems*  
1633 *affected your work a great deal.*

1634

1635 Consider only how much health problems affected  
1636 productivity while you were working.

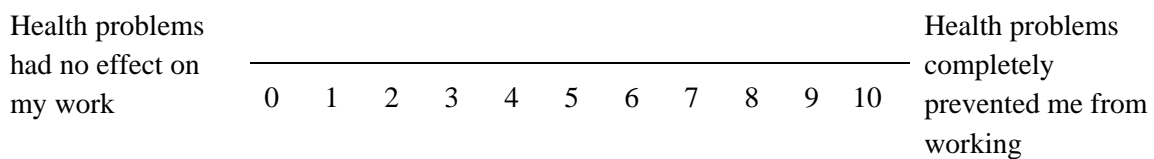

1637 CIRCLE A NUMBER

1638

1639 6. During the past seven days, how much did your health problems affect your ability to do your regular  
1640 daily activities, other than work at a job?

1641  
1642 *By regular activities, we mean the usual activities you do, such as work around the house, shopping,*  
1643 *childcare, exercising, studying, etc. Think about times you were limited in the amount or kind of*  
1644 *activities you could do and times you accomplished less than you would like. If health problems*  
1645 *affected your activities only a little, choose a low number. Choose a high number if health problems*  
1646 *affected your activities a great deal.*

1647

1648 Consider only how much health problems affected your ability  
1649 to do your regular daily activities, other than work at a job.

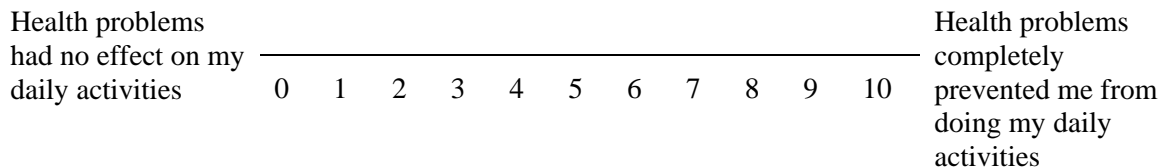

1650 CIRCLE A NUMBER

1651



1652 **APPENDIX I. PATIENT’S GLOBAL IMPRESSION OF CHANGE (PGIC)**  
 1653 **SCALE**

1654  
 1655 Date \_\_\_\_\_ Patient Name \_\_\_\_\_ Date of Birth \_\_\_\_\_

1656 Chief Complaint (Presenting Problem): \_\_\_\_\_

1657  
 1658 Since beginning treatment at this clinic, how would you describe the change (if any) in ACTIVITY  
 1659 LIMITATIONS, SYMPTOMS, EMOTIONS, and OVERALL QUALITY OF LIFE, related to your painful  
 1660 condition? Please circle the number below, that matches your degree of change since beginning care at this  
 1661 clinic for the above stated chief complaint.

1662

| No change | Almost the same | A little better | Somewhat better | Moderately better | Better | A great deal better |
|-----------|-----------------|-----------------|-----------------|-------------------|--------|---------------------|
| 1         | 2               | 3               | 4               | 5                 | 6      | 7                   |

1663  
 Explanation:

- 1 = No change (or condition has got worse)
- 2 = Almost the same, hardly any change at all
- 3 = A little better, but no noticeable change
- 4 = Somewhat better, but the change has not made any real difference
- 5 = Moderately better, and a slight but noticeable change
- 6 = Better, and a definite improvement that has made a real and worthwhile difference
- 7 = A great deal better, and a considerable improvement that has made all the difference

1664 Patient’s signature: X \_\_\_\_\_

1665

**Do not write in this box - FOR OFFICE USE ONLY.**

**NOTE TO HEALTH CARE PROVIDER**

A significant, favorable change is a score of 5- 7  
 No significant change is a 1-4 response.  
 Note, this is a dichotomous scale (5-7 = yes; 1-4 = no).  
 A 2-point change is significant from their last reported score.

*Reference: Hurst H, Bolton J. Assessing the clinical significance of change scores recorded on subjective outcome measures. Journal of Manipulative Physiological Therapeutics (JMPT) 2004;27:26-35.*
